# Supplementary material for: Direct biomass valorisation to γ-valerolactone by Ru-PNP catalysed hydrogenation in acid
Source: Royal Society of Chemistry journal article supplement (doi:10.1039/d3ey00247k), 2024-01-01
Supplement: d3ey00247k1.pdf [file d3ey00247k1.pdf]

Supplementary Information

## Direct biomass valorisation to $\gamma$ -valerolactone by Ru-PNP catalysed hydrogenation in acid

Sakhitha Koranchalil<sup>a</sup> and Martin Nielsen<sup>\*a</sup>

<sup>a</sup> Department of Chemistry, Technical University of Denmark. Kemitorvet 207, DK - 2800 Kgs. Lyngby Denmark. E-mail: [marnie@kemi.dtu.dk](mailto:marnie@kemi.dtu.dk)

### 1. Experimental section

#### 1.1. Material and Methods

Most chemicals were purchased from commercial suppliers and used without further purification unless otherwise stated. Ru-MACHO-BH, 85 w/w% H<sub>3</sub>PO<sub>4</sub> are commercially available and used without further purification. Beechwood sawdust was obtained from a local wood processing company. Peels of potato and banana were sourced from local supermarkets in Copenhagen. Grass and wheat straw were among the feedstock that was collected directly from the surrounding land. Toilet paper, coffee grounds, pistachio shells, potato flour, bamboo, and rice grains were purchased from local supermarkets in the Copenhagen municipality. Used coffee grounds were used as for the reaction. Chitin was commercially obtained from Merck. All the lignocellulosic biomass materials were grinded into powders using ball milling process and dried in vacuum oven before use.

H<sub>2</sub> gas (H<sub>2</sub>O  $\leq$  3 ppm; O<sub>2</sub>  $\leq$  2 ppm) was purchased from Air Liquide. All reactions dealing with air or moisture-sensitive compounds were performed using standard Schlenk techniques or in an argon-filled glovebox. GC-FID were recorded on an Agilent 19091J-413 HP-5 5% Phenyl methyl siloxane capillary column using 1,4-dioxane as the internal standard. The <sup>1</sup>H and <sup>13</sup>C NMR spectra were recorded on a Bruker Advance III 400 MHz spectrometer. The batches for gas analysis, the gas phase was carefully collected in a gas bag and analysed by MicroGC. TGA was fulfilled under N<sub>2</sub> atmosphere (30 mL min<sup>-1</sup>) using a METTLER TOLEDO thermal analyser in the temperature interval 25-300 °C with a constant heating rate of 10 °C min<sup>-1</sup>.

#### 1.2. General procedure for catalysis

For a typical hydrogenation experiment, in a glove box, biomass (91 mg) and Ru-MACHO-BH (1.8 wt%, 1.6 mg) were weighed in a glass vial equipped with a magnetic stir bar and sealed with a Teflon-lined cap. Upon bringing the glass vial outside the glove box, 1 mL of solvent (H<sub>2</sub>O) followed by addition of 85 w/w% aqueous phosphoric acid. Subsequently, the vial was placed in a seven-well reactor with a needle placed through the rubber stopper of the vials for the gas flow. The high-pressure reactor was sealed tightly and flushed with argon/hydrogen (three times) and finally required hydrogen pressure (30 bar) was loaded into the high-pressure reactor and desired temperature of 140 °C was also applied. The reactor was cooled to room temperature before the hydrogen was released and the sample was prepared for GC analysis. The liquid sample was prepared for GC analysis by adding 100  $\mu$ l of 1,4-dioxane (internal standard) followed by dilution of the mixture with 3.75 mL of dichloromethane (DCM). The yield of GVL in the mixture is calculated by using calibration curve. To generate a calibration curve, standard GVL samples of various known concentrations along with 1,4-dioxane (100  $\mu$ l) with total volume made up to 10 mL with DCM and are injected into the GC.

## 2. Theoretical yield calculation

For sawdust

| Lignocellulosic content | wt% | M per unit              |
|-------------------------|-----|-------------------------|
| Hemicellulose           | 37  | 132 g mol <sup>-1</sup> |
| Cellulose               | 42  | 162 g mol <sup>-1</sup> |
| Lignin                  | 19  | -                       |

Maximum theoretical yield is calculated assuming both hemicellulose and cellulose are completely converted into GVL. Also calculated with respect to dry biomass.

For e.g. beech wood sawdust (91 mg, corresponding to 0.26 mmol hemicellulose and 0.28 mmol cellulose).

Molecular weight of GVL=100.1 g mol<sup>-1</sup>

$$\text{Max theoretical amount yield} = 0.091 \text{ g} \left[ \frac{0.42}{162 \text{ g mol}^{-1}} + \frac{0.37}{132 \text{ g mol}^{-1}} \right]$$

$$\text{Max theoretical amount yield} = 0.491 \cdot 10^{-3} \text{ mol}$$

$$\text{Max theoretical weight yield} = 0.491 \cdot 10^{-3} \text{ mol} \cdot 100.1 \text{ g mol}^{-1} = 49.1 \text{ mg}$$

$$\therefore \text{Yield based on theoretical yield for 26 wt\%: } \frac{0,26 \cdot 91}{49.1} \times 100\% = 48\%$$

### 3. Catalytic studies

**Table S1.** Optimization of the direct conversion of beechwood sawdust to GVL.

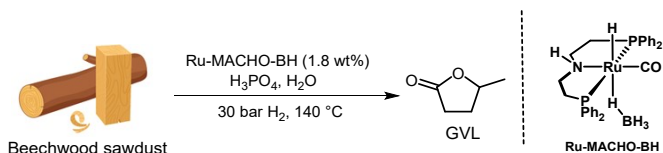

| Beechwood sawdust content<br> |     | Entry           | $c(\text{H}_3\text{PO}_4)$<br>[M] | t [h] | GVL yield <sup>a</sup><br>[wt% (mol%)] |
|----------------------------------------------------------------------------------------------------------------|-----|-----------------|-----------------------------------|-------|----------------------------------------|
| Lignocellulosic content                                                                                        | wt% | 1               | 7.5                               | 96    | 15 (28)                                |
| Hemicellulose                                                                                                  | 37  | 2               | 9.3                               | 24    | 22 (41)                                |
| Cellulose                                                                                                      | 42  | 3               | 9.3                               | 96    | 23 (43)                                |
| Lignin                                                                                                         | 19  | 4               | 9.3                               | 168   | 20 (37)                                |
|                                                                                                                |     | 5               | 10.1                              | 24    | 25 (46)                                |
|                                                                                                                |     | 6               | 10.1                              | 38    | 21 (39)                                |
|                                                                                                                |     | 7               | 10.1                              | 96    | 19 (35)                                |
|                                                                                                                |     | 8               | 10.9                              | 18    | 21 (39)                                |
|                                                                                                                |     | 9               | 10.9                              | 24    | 26 (48)                                |
|                                                                                                                |     | 10              | 10.9                              | 96    | 18 (33)                                |
|                                                                                                                |     | 11 <sup>b</sup> | 10.9                              | 24    | 14 (26)                                |
|                                                                                                                |     | 12 <sup>c</sup> | 10.9                              | 48    | -                                      |

Standard reaction conditions: Beech wood (91 mg, corresponding to 0.26 mmol hemicellulose and 0.28 mmol cellulose [34], Ru-MACHO-BH (1.65 mg, 0.0028 mmol), H<sub>2</sub>O at 140 °C and 30 bar H<sub>2</sub>.<sup>a</sup> Determined by GC-FID. Yields are calculated with respect to dry biomass. <sup>b</sup> 1:1 V/V EtOH/H<sub>2</sub>O (1 mL). <sup>c</sup> no addition of H<sub>2</sub>.

**Table S2:** Optimization of direct conversion of sawdust and straw to GVL.

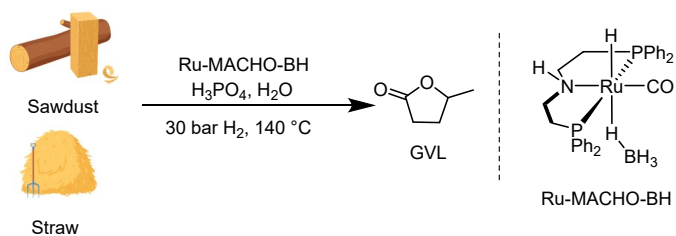

| Biomass                        |     | Entry          | H <sub>3</sub> PO <sub>4</sub><br>[M] | Time<br>[h] | GVL yield <sup>a</sup><br>[wt% (mol%)] |
|--------------------------------|-----|----------------|---------------------------------------|-------------|----------------------------------------|
| <b>Beechwood sawdust</b>       |     |                |                                       |             |                                        |
| <i>Lignocellulosic content</i> | wt% | 1 <sup>b</sup> | 10.9                                  | 48          | 8 (15)                                 |
| Hemicellulose                  | 37  |                |                                       |             |                                        |
| Cellulose                      | 42  |                |                                       |             |                                        |
| Lignin                         | 19  |                |                                       |             |                                        |
| <b>Wheat straw</b>             |     |                |                                       |             |                                        |
| <i>Lignocellulosic content</i> | wt% | 2              | 9.3                                   | 24          | 12 (31)                                |
| Hemicellulose                  | 25  | 3              | 10.9                                  | 24          | 12 (31)                                |
| Cellulose                      | 33  | 4              | 11.8                                  | 96          | 17 (43)                                |
| Lignin                         | 17  | 5 <sup>c</sup> | 10.9                                  | 24          | 11 (28)                                |
|                                |     | 6 <sup>d</sup> | 10.9                                  | 48          | 3 (8)                                  |

Standard reaction conditions: Beech wood (1g) and wheat straw (91 mg), Ru-MACHO-BH (1.65 mg, 0.0028 mmol), H<sub>2</sub>O (1 mL) at 140 °C and 30 bar H<sub>2</sub>. <sup>a</sup> Determined by GC-FID using 1,4-dioxane as the internal standard. Yields are calculated with respect to dry biomass. <sup>b</sup> Beechwood (1g), Ru-MACHO-BH (20 mg), H<sub>2</sub>O (15 mL). <sup>c</sup> 1:1 v/v EtOH/H<sub>2</sub>O (1 mL). <sup>d</sup> Wheat straw (1g), Ru-MACHO-BH (20 mg), H<sub>2</sub>O (15 mL).

#### 4. Calibration curve, GC-FID and NMR

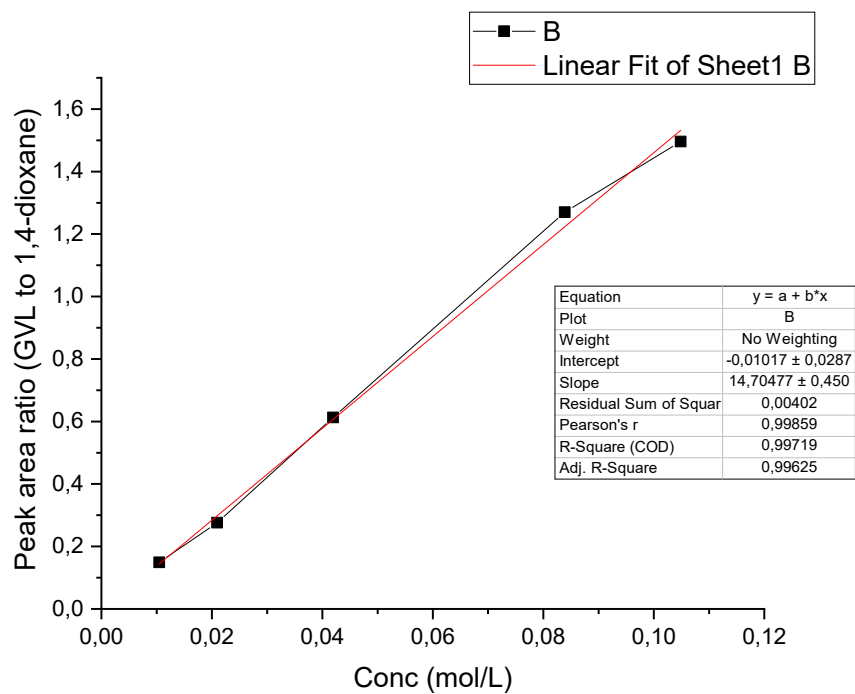

Figure S1. Calibration curve for GVL using 1,4-dioxane as the internal standard.

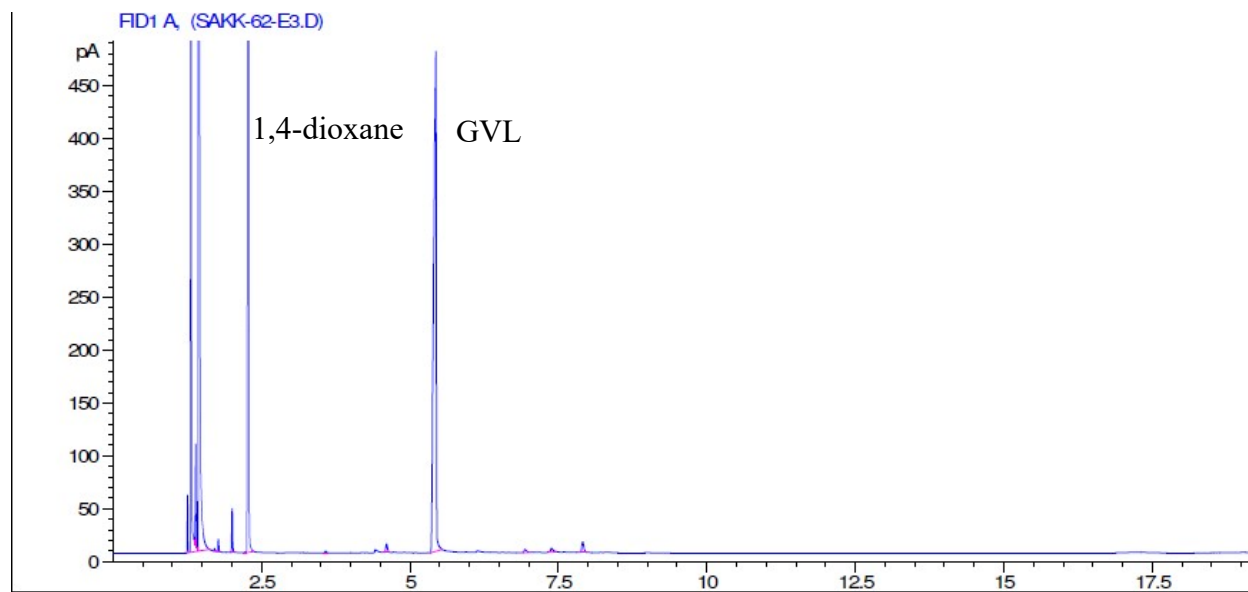


---



---

Area Percent Report

---



---

Sorted By : Signal  
 Calib. Data Modified : 12/8/2006 12:33:15 PM  
 Multiplier : 1.0000  
 Dilution : 1.0000  
 Use Multiplier & Dilution Factor with ISTDs

Signal 1: FID1 A,

| Peak # | RetTime [min] | Type | Width [min] | Area [pA*s] | Area %   | Name |
|--------|---------------|------|-------------|-------------|----------|------|
| 1      | 1.257         | BB   | 7.25e-3     | 24.22780    | 0.03133  | ?    |
| 2      | 1.315         | BV S | 7.77e-3     | 5316.80273  | 6.87569  | ?    |
| 3      | 1.370         | BV X | 7.47e-3     | 2.32947     | 0.00301  | ?    |
| 4      | 1.393         | VV X | 0.0141      | 83.79234    | 0.10836  | ?    |
| 5      | 1.414         | VV X | 8.36e-3     | 24.28563    | 0.03141  | ?    |
| 6      | 1.435         | VB S | 0.0102      | 6.77674e4   | 87.63684 | ?    |
| 7      | 1.709         | BB   | 0.0143      | 2.55260     | 0.00330  | ?    |
| 8      | 1.776         | BB   | 0.0117      | 9.05608     | 0.01171  | ?    |
| 9      | 2.007         | BB   | 0.0139      | 37.99453    | 0.04913  | ?    |
| 10     | 2.221         | BV   | 0.0151      | 6.83144e-1  | 0.00088  | ?    |
| 11     | 2.281         | VB   | 0.0177      | 2557.00781  | 3.30672  | ?    |
| 12     | 2.993         |      | 0.0000      | 0.00000     | 0.00000  | C14  |
| 13     | 3.466         |      | 0.0000      | 0.00000     | 0.00000  | C15  |
| 14     | 3.577         | BB   | 0.0277      | 3.27026     | 0.00423  | ?    |
| 15     | 3.926         |      | 0.0000      | 0.00000     | 0.00000  | C16  |
| 16     | 4.604         | BB   | 0.0311      | 16.18981    | 0.02094  | ?    |
| 17     | 5.433         | BB   | 0.0399      | 1439.08240  | 1.86102  | ?    |
| 18     | 6.936         | BB   | 0.0363      | 8.08529     | 0.01046  | ?    |

**Figure S2.** GC-FID of the crude mixture of the reaction of xylose (0.6 M) with Ru-MACHO-BH (0.5 mol%) using 5.7 M H<sub>3</sub>PO<sub>4</sub>(aq) and under 30 bar H<sub>2</sub> at 125 °C in 1:1 v/v EtOH/H<sub>2</sub>O after 48 hours.

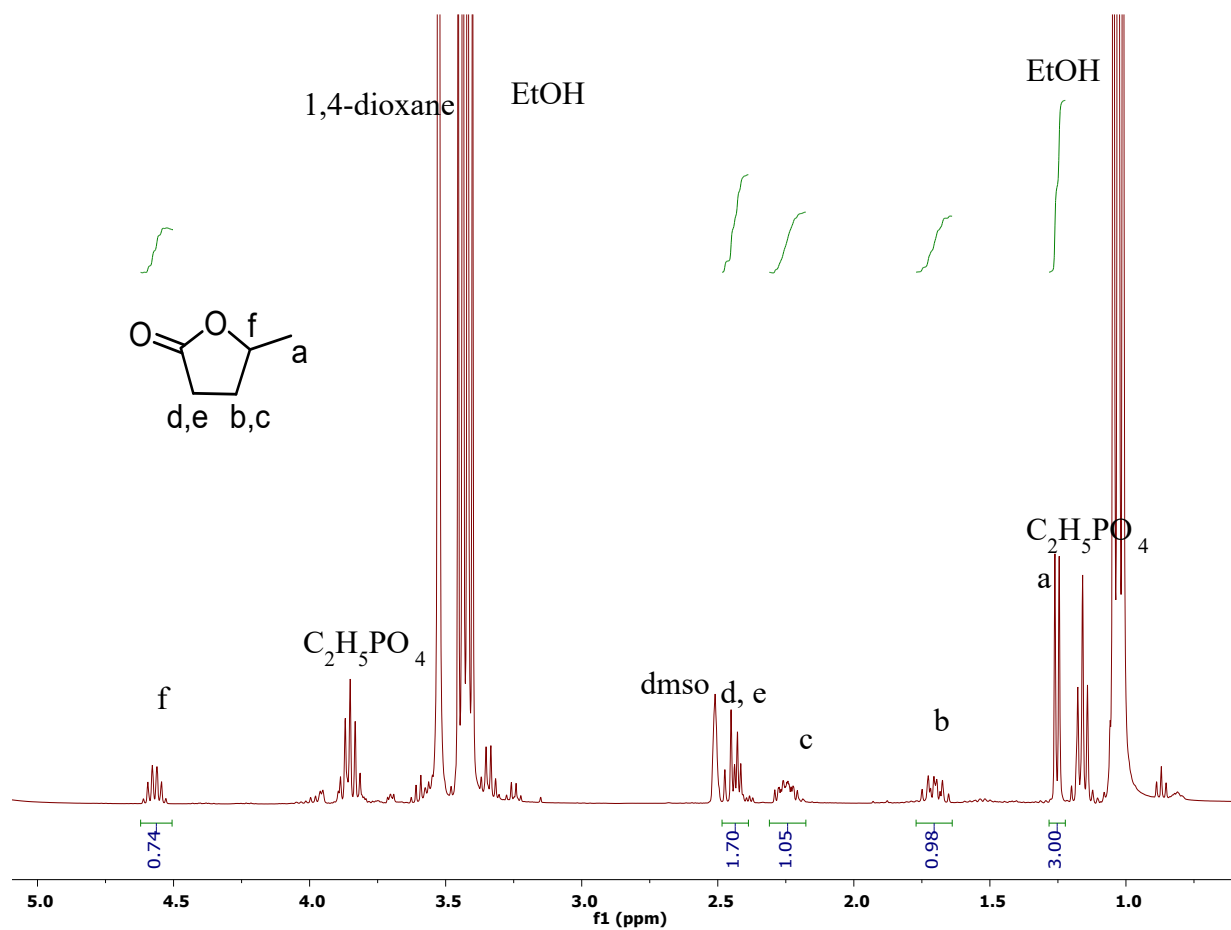

**Figure S3.**  $^1H$  NMR ( $dmsO-d_6$ , 400 MHz) of the crude reaction of 0.6 mmol xylose (0.6 M) and Ru-MACHO-BH (0.5 mol%) using 5.7 M  $H_3PO_4(aq)$  under 30 bar  $H_2$  at 125 °C in 1:1 v/v EtOH/ $H_2O$  mixture after 48 hours.

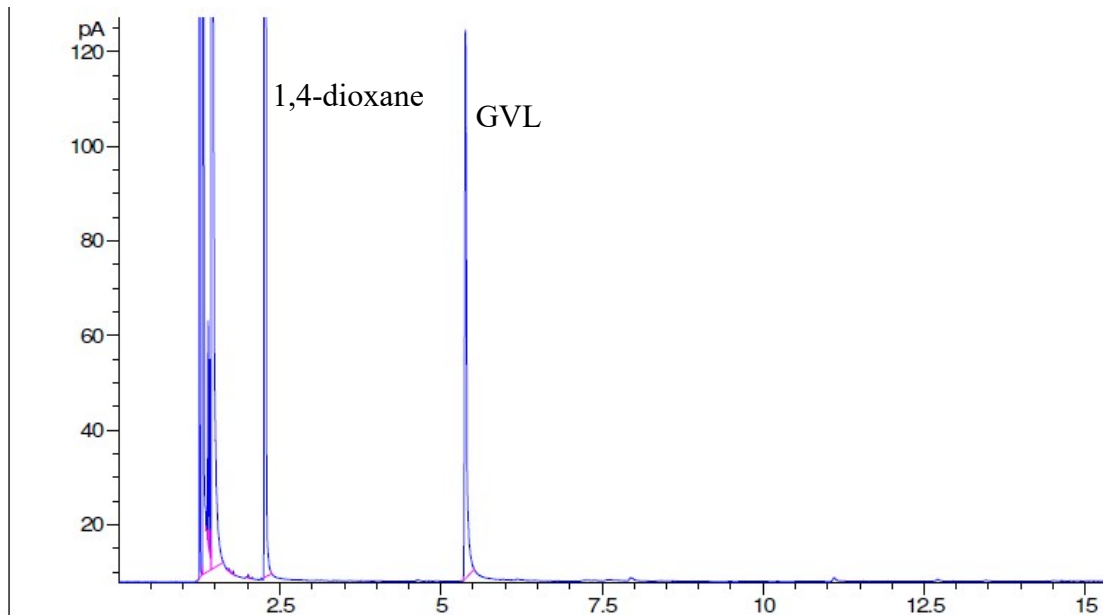


---



---

Area Percent Report

---



---

Sorted By : Signal  
 Calib. Data Modified : 12/8/2006 12:33:15 PM  
 Multiplier : 1.0000  
 Dilution : 1.0000  
 Use Multiplier & Dilution Factor with ISTDs

Signal 1: FID1 A,

| Peak # | RetTime [min] | Type | Width [min] | Area [pA*s] | Area %   | Name |
|--------|---------------|------|-------------|-------------|----------|------|
| 1      | 1.255         | BB S | 6.41e-3     | 295.08820   | 0.41539  | ?    |
| 2      | 1.314         | BV S | 7.62e-3     | 4553.75879  | 6.41030  | ?    |
| 3      | 1.370         | BV X | 7.75e-3     | 2.13731     | 0.00301  | ?    |
| 4      | 1.392         | VV X | 0.0138      | 39.80243    | 0.05603  | ?    |
| 5      | 1.413         | VV X | 7.92e-3     | 20.70781    | 0.02915  | ?    |
| 6      | 1.435         | VB S | 0.0105      | 6.34078e4   | 89.25874 | ?    |
| 7      | 1.708         | BB   | 0.0177      | 6.89576e-1  | 0.00097  | ?    |
| 8      | 1.777         | BB   | 0.0108      | 4.93933e-1  | 0.00070  | ?    |
| 9      | 2.013         | BB   | 0.0157      | 8.32473e-1  | 0.00117  | ?    |
| 10     | 2.280         | BB   | 0.0180      | 2475.71704  | 3.48505  | ?    |
| 11     | 2.993         |      | 0.0000      | 0.00000     | 0.00000  | C14  |
| 12     | 3.466         |      | 0.0000      | 0.00000     | 0.00000  | C15  |
| 13     | 3.926         |      | 0.0000      | 0.00000     | 0.00000  | C16  |
| 14     | 5.380         | BB   | 0.0315      | 241.17174   | 0.33950  | ?    |

**Figure S4.** GC-FID of the reaction mixture of the reaction of xylose (0.1 M) and Ru-MACHO-BH (0.5 mol%) using 5.7 M H<sub>3</sub>PO<sub>4</sub>(aq) under 30 bar H<sub>2</sub> at 125 °C in 1:1 v/v EtOH/H<sub>2</sub>O mixture after 48 hours.



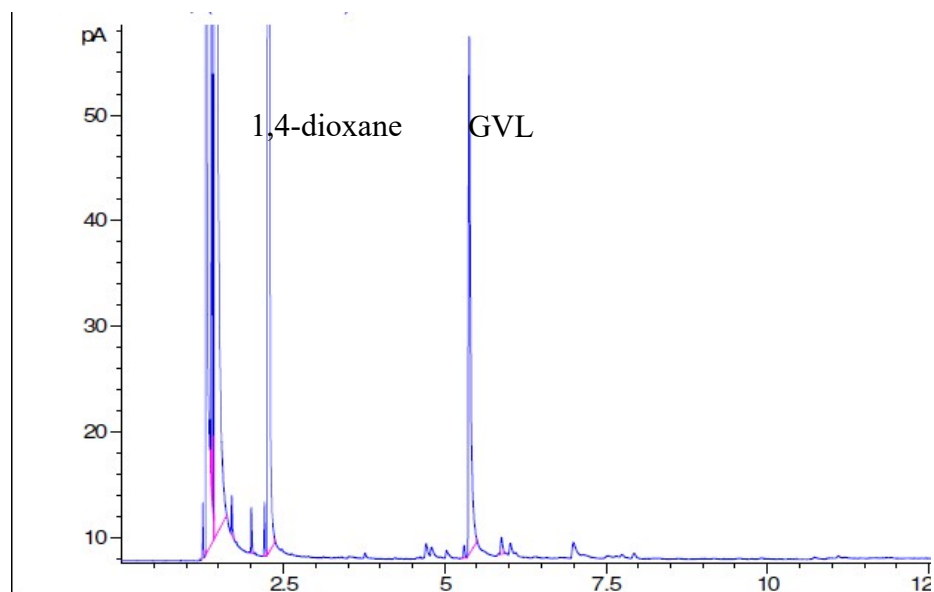


---



---

Area Percent Report

---



---

Sorted By : Signal  
 Calib. Data Modified : 12/8/2006 12:33:15 PM  
 Multiplier : 1.0000  
 Dilution : 1.0000  
 Use Multiplier & Dilution Factor with ISTDs

Signal 1: FID1 A,

| Peak # | RetTime [min] | Type | Width [min] | Area [pA*s] | Area %   | Name |
|--------|---------------|------|-------------|-------------|----------|------|
| 1      | 1.259         | BB   | 8.90e-3     | 2.86774     | 0.00384  | ?    |
| 2      | 1.315         | BV S | 7.71e-3     | 5080.50244  | 6.80246  | ?    |
| 3      | 1.370         | BV X | 7.31e-3     | 2.04384     | 0.00274  | ?    |
| 4      | 1.393         | VV X | 0.0141      | 61.48492    | 0.08232  | ?    |
| 5      | 1.414         | VV X | 8.05e-3     | 21.36893    | 0.02861  | ?    |
| 6      | 1.436         | VB S | 0.0105      | 6.61445e4   | 88.56311 | ?    |
| 7      | 1.707         | BB   | 0.0137      | 3.35637     | 0.00449  | ?    |
| 8      | 2.011         | BB   | 0.0145      | 3.99035     | 0.00534  | ?    |
| 9      | 2.216         | BB   | 0.0156      | 5.09153     | 0.00682  | ?    |
| 10     | 2.284         | BB   | 0.0184      | 3242.40674  | 4.34137  | ?    |
| 11     | 2.993         |      | 0.0000      | 0.00000     | 0.00000  | C14  |
| 12     | 3.466         |      | 0.0000      | 0.00000     | 0.00000  | C15  |
| 13     | 3.926         |      | 0.0000      | 0.00000     | 0.00000  | C16  |
| 14     | 5.301         | BB   | 0.0248      | 1.83525     | 0.00246  | ?    |
| 15     | 5.378         | BB   | 0.0338      | 113.39149   | 0.15182  | ?    |
| 16     | 5.880         | BB   | 0.0340      | 3.44956     | 0.00462  | ?    |

**Figure S5.** GC-FID of the reaction mixture of glucose (0.1 M) and Ru-MACHO-BH (0.5 mol%) using 5.7 M H<sub>3</sub>PO<sub>4</sub>(aq) under 30 bar H<sub>2</sub> at 125 °C in 1:1 v/v EtOH/H<sub>2</sub>O mixture after 48 hours.

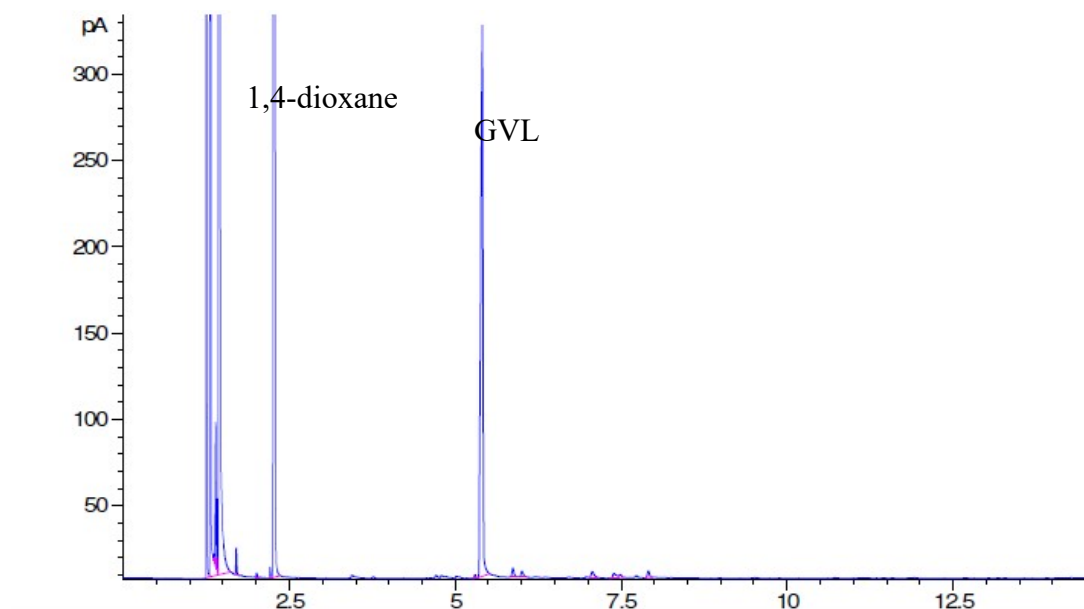


---



---

Area Percent Report

---



---

Sorted By : Signal  
 Calib. Data Modified : 12/8/2006 12:33:15 PM  
 Multiplier : 1.0000  
 Dilution : 1.0000  
 Use Multiplier & Dilution Factor with ISTDs

Signal 1: FID1 A,

| Peak # | RetTime [min] | Type | Width [min] | Area [pA*s] | Area %   | Name |
|--------|---------------|------|-------------|-------------|----------|------|
| 1      | 1.255         | BV S | 6.43e-3     | 698.01837   | 0.95828  | ?    |
| 2      | 1.314         | VV S | 7.67e-3     | 4462.77783  | 6.12679  | ?    |
| 3      | 1.370         | BV X | 8.24e-3     | 2.49964     | 0.00343  | ?    |
| 4      | 1.392         | VV X | 0.0133      | 69.36193    | 0.09522  | ?    |
| 5      | 1.413         | VV X | 8.36e-3     | 20.82538    | 0.02859  | ?    |
| 6      | 1.435         | VB S | 9.95e-3     | 6.39320e4   | 87.76988 | ?    |
| 7      | 1.705         | BB   | 0.0121      | 12.34311    | 0.01695  | ?    |
| 8      | 2.011         | BB   | 0.0144      | 2.31383     | 0.00318  | ?    |
| 9      | 2.215         | BB   | 0.0155      | 6.15900     | 0.00846  | ?    |
| 10     | 2.281         | BB   | 0.0175      | 2825.18774  | 3.87860  | ?    |
| 11     | 2.993         |      | 0.0000      | 0.00000     | 0.00000  | C14  |
| 12     | 3.466         |      | 0.0000      | 0.00000     | 0.00000  | C15  |
| 13     | 3.926         |      | 0.0000      | 0.00000     | 0.00000  | C16  |
| 14     | 5.297         | BB   | 0.0249      | 3.10943     | 0.00427  | ?    |
| 15     | 5.407         | BB   | 0.0344      | 754.19977   | 1.03541  | ?    |
| 16     | 5.866         | BB   | 0.0317      | 10.75708    | 0.01477  | ?    |
| 17     | 6.004         | BB   | 0.0338      | 8.02883     | 0.01102  | ?    |

**Figure S6.** GC-FID of the crude reaction mixture of fructose (0.1 M) and Ru-MACHO-BH (0.5 mol%) using 5.7 M H<sub>3</sub>PO<sub>4</sub>(aq) under 30 bar H<sub>2</sub> at 125 °C in 1:1 v/v EtOH/H<sub>2</sub>O mixture after 48 hours.

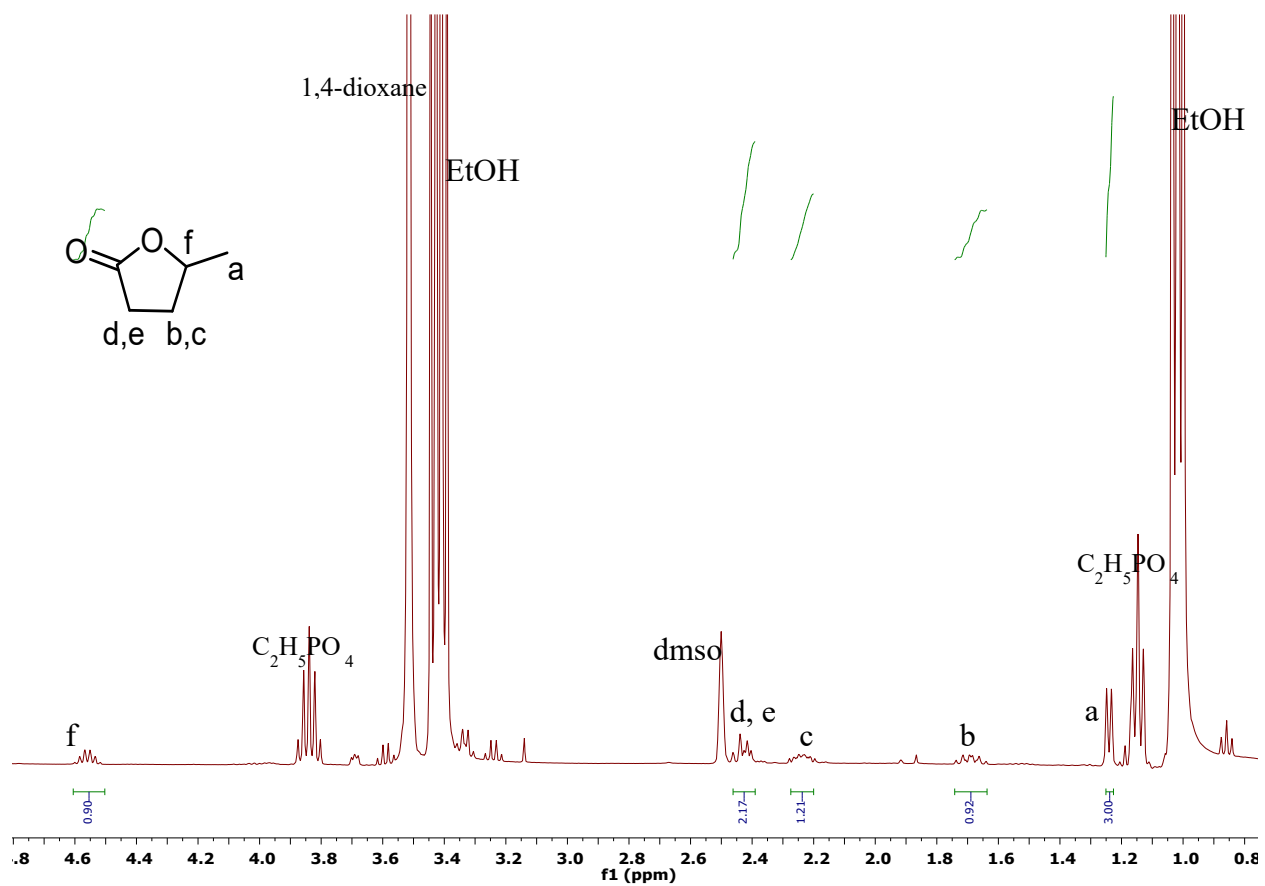

**Figure S7.** <sup>1</sup>H NMR (dmsol-d<sub>6</sub>, 400 MHz) of the crude reaction of fructose (0.1 M) and Ru-MACHO-BH (0.5 mol%) using 5.7 M H<sub>3</sub>PO<sub>4</sub>(aq) under 30 bar H<sub>2</sub> at 125 °C in 1:1 v/v EtOH/H<sub>2</sub>O mixture after 48 hours.

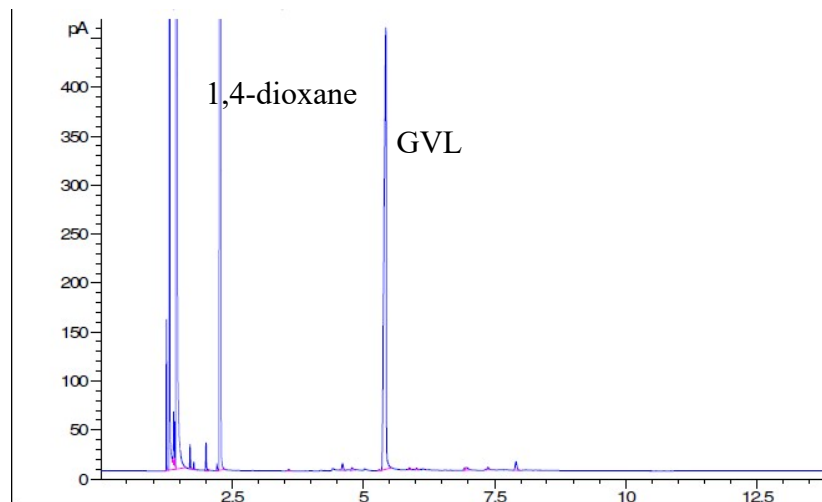


---



---

Area Percent Report

---



---

Sorted By : Signal  
 Calib. Data Modified : 12/8/2006 12:33:15 PM  
 Multiplier : 1.0000  
 Dilution : 1.0000  
 Use Multiplier & Dilution Factor with ISTDs

Signal 1: FID1 A,

| Peak # | RetTime [min] | Type | Width [min] | Area [pA*s] | Area %   | Name |
|--------|---------------|------|-------------|-------------|----------|------|
| 1      | 1.256         | BB   | 6.81e-3     | 67.07451    | 0.08230  | ?    |
| 2      | 1.314         | BV S | 8.03e-3     | 5192.20654  | 6.37053  | ?    |
| 3      | 1.371         | BV X | 7.34e-3     | 2.04072     | 0.00250  | ?    |
| 4      | 1.393         | VV X | 0.0144      | 46.74556    | 0.05735  | ?    |
| 5      | 1.414         | VV X | 8.01e-3     | 22.86432    | 0.02805  | ?    |
| 6      | 1.435         | VB S | 0.0110      | 7.19634e4   | 88.29481 | ?    |
| 7      | 1.705         | BB   | 0.0120      | 19.52512    | 0.02396  | ?    |
| 8      | 1.776         | BB   | 0.0122      | 6.01460     | 0.00738  | ?    |
| 9      | 2.008         | BB   | 0.0143      | 25.60098    | 0.03141  | ?    |
| 10     | 2.216         | BB   | 0.0155      | 6.97473     | 0.00856  | ?    |
| 11     | 2.282         | BB   | 0.0180      | 2797.69287  | 3.43260  | ?    |
| 12     | 2.993         |      | 0.0000      | 0.00000     | 0.00000  | C14  |
| 13     | 3.466         |      | 0.0000      | 0.00000     | 0.00000  | C15  |
| 14     | 3.578         | BB   | 0.0269      | 2.47971     | 0.00304  | ?    |
| 15     | 3.926         |      | 0.0000      | 0.00000     | 0.00000  | C16  |
| 16     | 4.604         | BB   | 0.0300      | 12.75125    | 0.01565  | ?    |
| 17     | 4.782         | BB   | 0.0295      | 5.19553     | 0.00637  | ?    |
| 18     | 5.305         | BB   | 0.0224      | 1.40013     | 0.00172  | ?    |
| 19     | 5.428         | BB   | 0.0377      | 1286.33301  | 1.57825  | ?    |
| 20     | 5.879         | BB   | 0.0289      | 3.58793     | 0.00440  | ?    |
| 21     | 6.014         | BB   | 0.0273      | 2.80556     | 0.00344  | ?    |
| 22     | 6.932         | BV   | 0.0275      | 4.75725     | 0.00584  | ?    |
| 23     | 6.968         | VB   | 0.0383      | 7.73025     | 0.00948  | ?    |
| 24     | 7.372         | BB   | 0.0338      | 6.22408     | 0.00764  | ?    |
| 25     | 7.910         | BB   | 0.0343      | 20.13674    | 0.02471  | ?    |

**Figure S8.** GC-FID of the reaction mixture of xylan from corn core (0.6 M) with 5.7 M of H<sub>3</sub>PO<sub>4</sub> and Ru-MACHO-BH (0.5 mol%) under 30 bar H<sub>2</sub> and 125 °C in 1:1 v/v EtOH/H<sub>2</sub>O mixture for 48 hours.

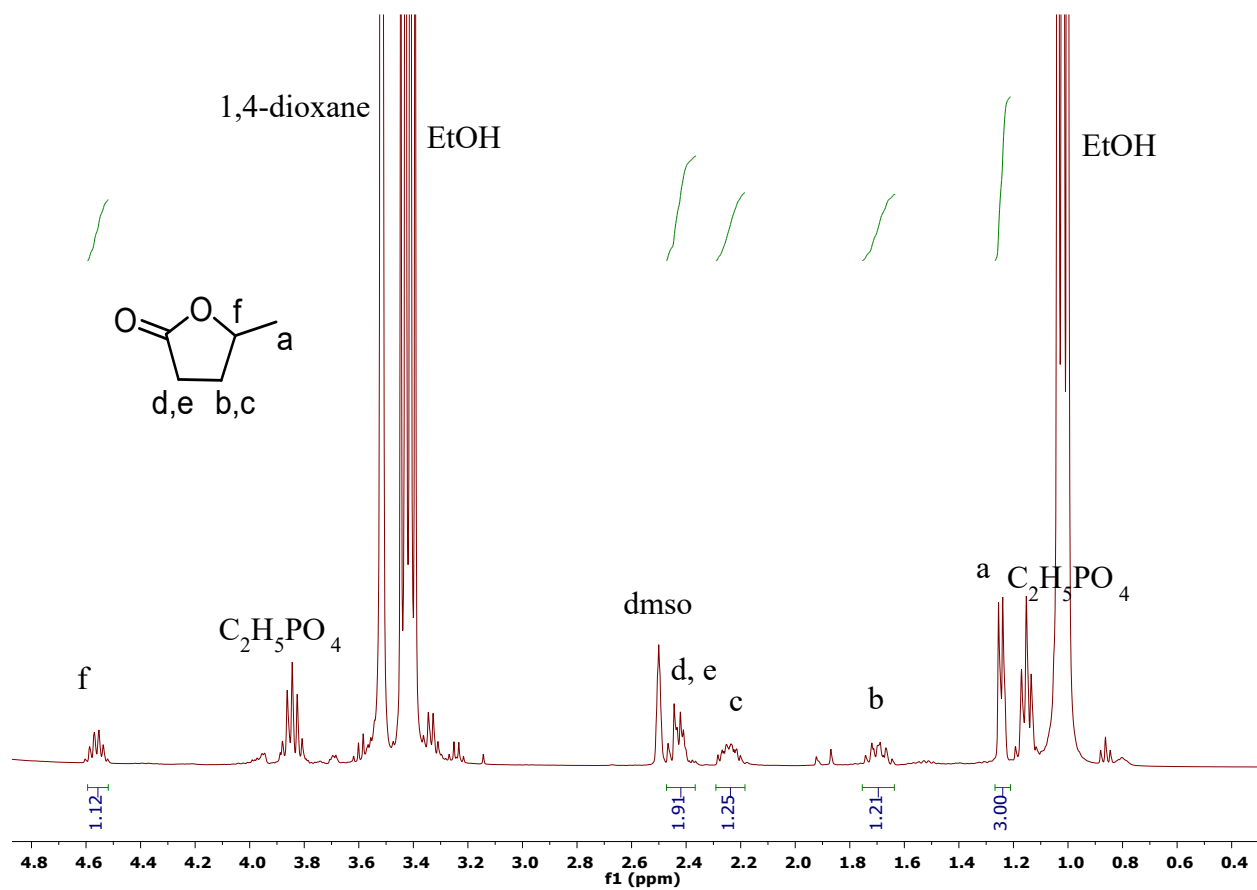

**Figure S9.** <sup>1</sup>H NMR (dms<sub>o</sub>-d<sub>6</sub>, 400 MHz) of the crude reaction of 0.6 mmol Xylan from corn core (0.6 mmol) with 5.7 M of H<sub>3</sub>PO<sub>4</sub> and Ru-MACHO-BH (0.5 mol%) under 30 bar H<sub>2</sub> and 125 °C in 1:1 v/v EtOH/H<sub>2</sub>O mixture for 48 hours.

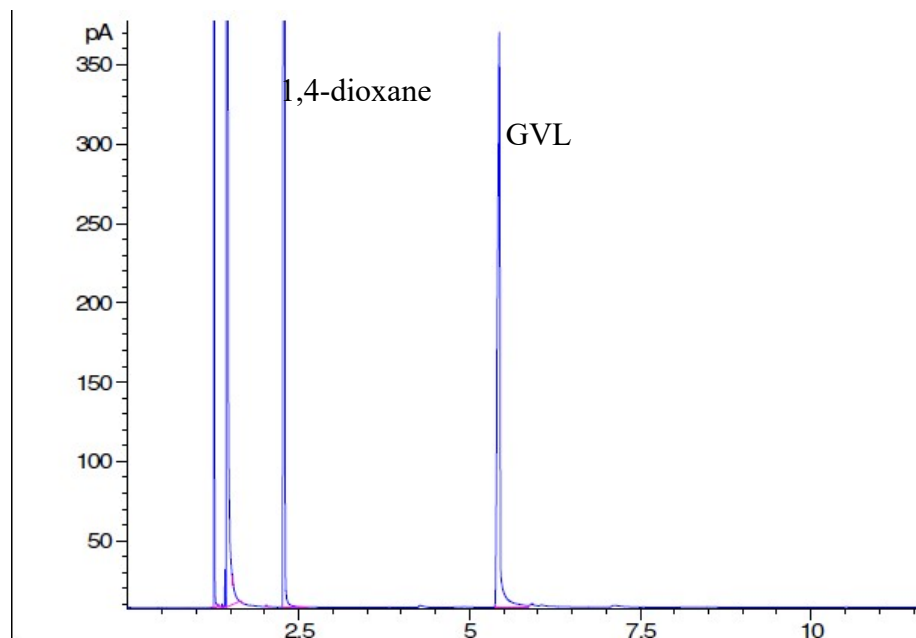


---



---

Area Percent Report

---



---

Sorted By : Signal  
 Calib. Data Modified : 12/8/2006 12:33:15 PM  
 Multiplier : 1.0000  
 Dilution : 1.0000  
 Use Multiplier & Dilution Factor with ISTDs

Signal 1: FID1 A,

| Peak # | RetTime [min] | Type | Width [min] | Area [pA*s] | Area %   | Name |
|--------|---------------|------|-------------|-------------|----------|------|
| 1      | 1.265         | BB S | 6.50e-3     | 488.99942   | 0.87026  | ?    |
| 2      | 1.325         | BB X | 0.0118      | 7.17597e-1  | 0.00128  | ?    |
| 3      | 1.381         | BV   | 9.55e-3     | 1.14271     | 0.00203  | ?    |
| 4      | 1.424         | VV   | 8.18e-3     | 12.44108    | 0.02214  | ?    |
| 5      | 1.446         | VB S | 0.0111      | 5.24361e4   | 93.31871 | ?    |
| 6      | 1.533         | BB X | 9.33e-3     | 1.75392     | 0.00312  | ?    |
| 7      | 1.649         | BB   | 0.0130      | 4.90495e-1  | 0.00087  | ?    |
| 8      | 2.030         | BB   | 0.0176      | 1.26432     | 0.00225  | ?    |
| 9      | 2.292         | BH   | 0.0170      | 2263.52075  | 4.02831  | ?    |
| 10     | 2.993         |      | 0.0000      | 0.00000     | 0.00000  | C14  |
| 11     | 3.466         |      | 0.0000      | 0.00000     | 0.00000  | C15  |
| 12     | 3.926         |      | 0.0000      | 0.00000     | 0.00000  | C16  |
| 13     | 5.435         | HH   | 0.0397      | 983.90466   | 1.75102  | ?    |

**Figure S10:** GC-FID of the reaction mixture of cellulose (0.6) with 7.5 M of H<sub>3</sub>PO<sub>4</sub>(aq) and Ru-MACHO-BH (0.5 mol%) under 30 bar H<sub>2</sub> and 140 °C in water for 96 hours.

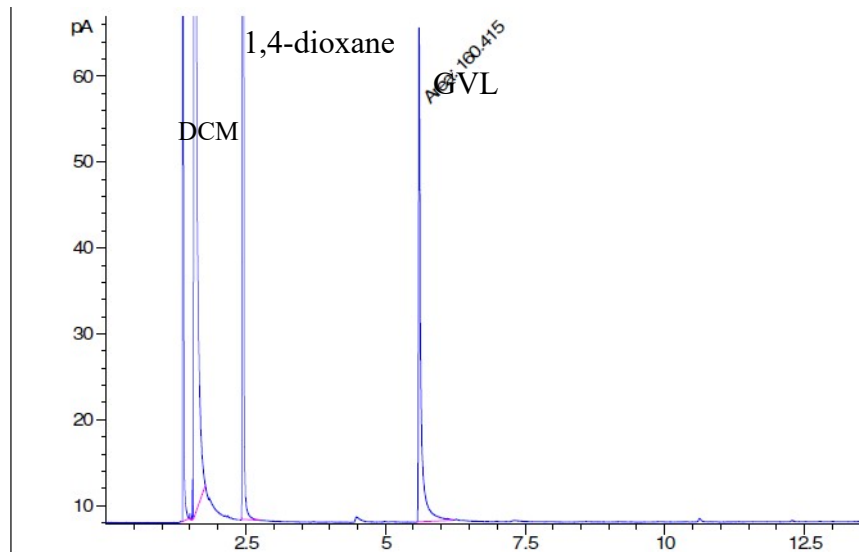


---

Area Percent Report

---

Sorted By : Signal  
 Calib. Data Modified : 12/8/2006 12:33:15 PM  
 Multiplier : 1.0000  
 Dilution : 1.0000  
 Use Multiplier & Dilution Factor with ISTDs

Signal 1: FID1 A,

| Peak # | RetTime [min] | Type | Width [min] | Area [pA*s] | Area %   | Name |
|--------|---------------|------|-------------|-------------|----------|------|
| 1      | 1.377         | BB   | 8.47e-3     | 201.97957   | 1.40650  | ?    |
| 2      | 1.502         | BB   | 9.87e-3     | 3.96411e-1  | 0.00276  | ?    |
| 3      | 1.549         | BV   | 9.28e-3     | 2.71882     | 0.01893  | ?    |
| 4      | 1.577         | VB S | 0.0103      | 1.34929e4   | 93.95897 | ?    |
| 5      | 2.450         | HB   | 0.0176      | 502.00952   | 3.49578  | ?    |
| 6      | 2.993         |      | 0.0000      | 0.00000     | 0.00000  | C14  |
| 7      | 3.466         |      | 0.0000      | 0.00000     | 0.00000  | C15  |
| 8      | 3.926         |      | 0.0000      | 0.00000     | 0.00000  | C16  |
| 9      | 5.602         | MM   | 0.0464      | 160.41508   | 1.11706  | ?    |

**Figure S11.** GC-FID of the reaction mixture of beechwood sawdust (91 mg) with 10.9 M of H<sub>3</sub>PO<sub>4</sub>(aq) and Ru-MACHO-BH (1.65 mg) under 30 bar H<sub>2</sub> and 140 °C in water for 24 hours (Table 4 in manuscript).

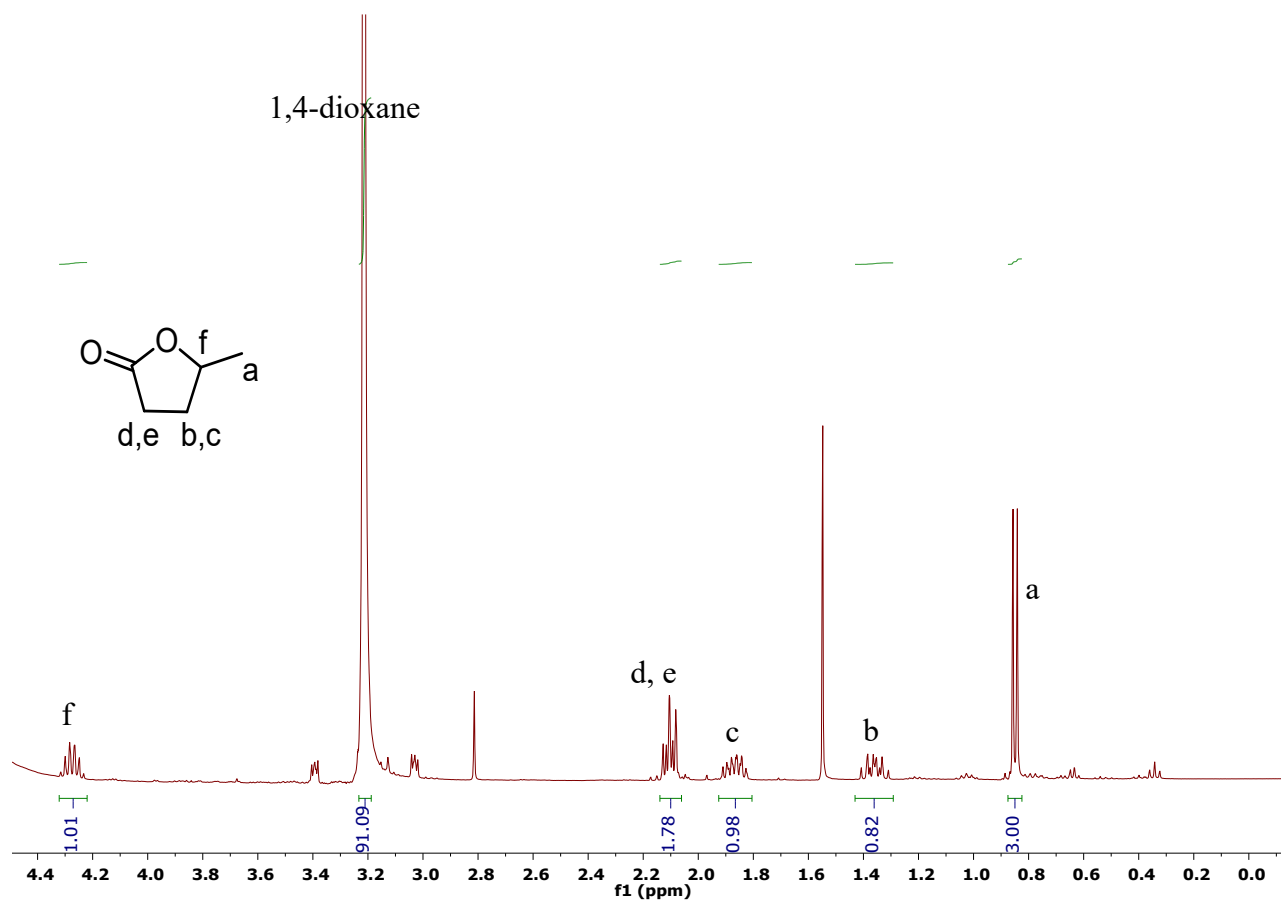

**Figure S12.**  $^1\text{H}$  NMR ( $\text{D}_2\text{O}$ , 400 MHz) of the crude reaction of beechwood sawdust (91 mg) with 10.9 M of  $\text{H}_3\text{PO}_4(\text{aq})$  and Ru-MACHO-BH (1.65 mg) under 30 bar  $\text{H}_2$  and 140  $^\circ\text{C}$  in water for 24 hours (Table 4 in manuscript).



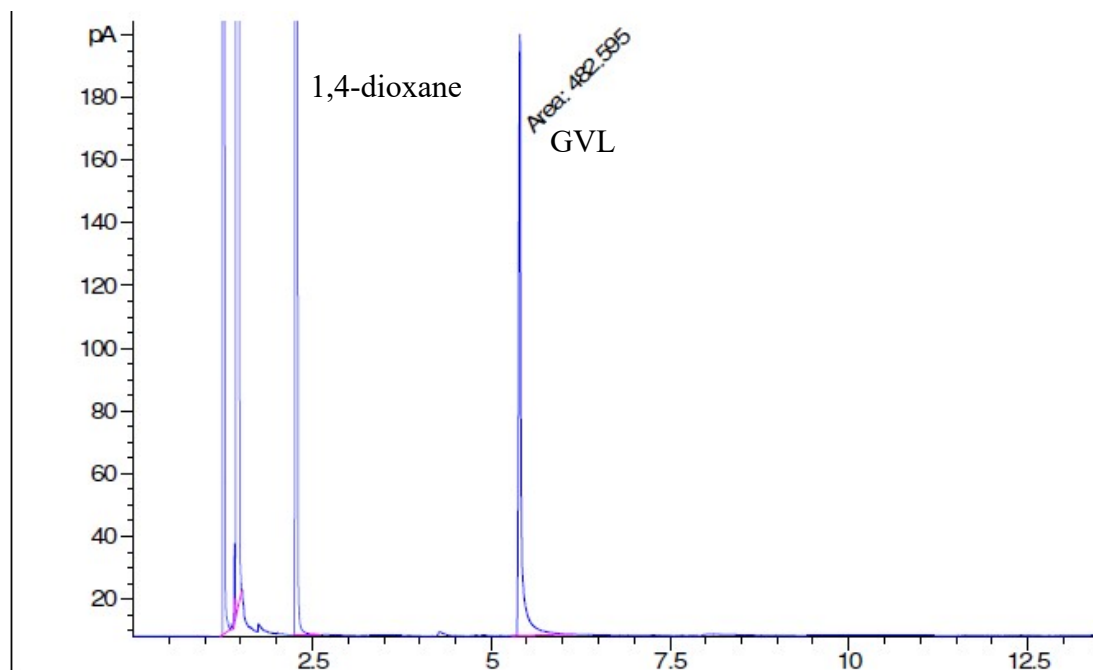


---



---

Area Percent Report

---



---

Sorted By : Signal  
 Calib. Data Modified : 12/8/2006 12:33:15 PM  
 Multiplier : 1.0000  
 Dilution : 1.0000  
 Use Multiplier & Dilution Factor with ISTDs

Signal 1: FID1 A,

| Peak # | RetTime [min] | Type | Width [min] | Area [pA*s] | Area %   | Name |
|--------|---------------|------|-------------|-------------|----------|------|
| 1      | 1.257         | BB S | 0.0122      | 2293.85376  | 1.90489  | ?    |
| 2      | 1.370         | BV   | 0.0120      | 1.65894     | 0.00138  | ?    |
| 3      | 1.414         | BV   | 0.0117      | 20.32687    | 0.01688  | ?    |
| 4      | 1.435         | VB S | 0.0261      | 1.15164e5   | 95.63568 | ?    |
| 5      | 2.286         | BH   | 0.0252      | 2457.04810  | 2.04041  | ?    |
| 6      | 2.993         |      | 0.0000      | 0.00000     | 0.00000  | C14  |
| 7      | 3.466         |      | 0.0000      | 0.00000     | 0.00000  | C15  |
| 8      | 3.926         |      | 0.0000      | 0.00000     | 0.00000  | C16  |
| 9      | 5.400         | MM   | 0.0419      | 482.59518   | 0.40076  | ?    |

**Figure S13.** GC-FID of the reaction mixture of wheat straw (91 mg) with 10.9 M of H<sub>3</sub>PO<sub>4</sub>(aq) and Ru-MACHO-BH (1.65 mg) under 30 bar H<sub>2</sub> and 140 °C in water for 48 hours (Table 4 in manuscript).

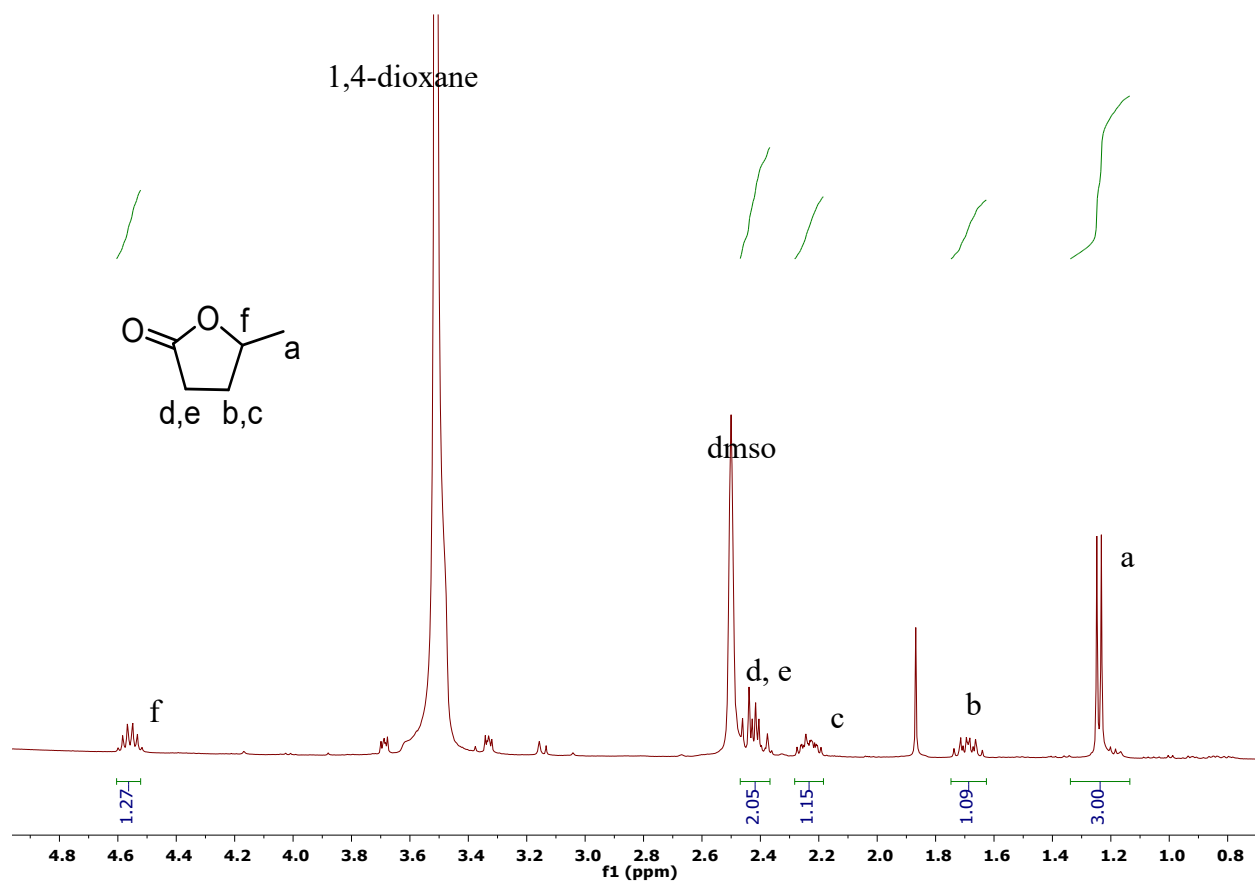

**Figure S14.**  $^1\text{H}$  NMR ( $\text{DMSO-d}_6$ , 400 MHz) of the crude reaction of wheat straw (91 mg) with 10.9 M of  $\text{H}_3\text{PO}_4(\text{aq})$  and Ru-MACHO-BH (1.65 mg) under 30 bar  $\text{H}_2$  and 140  $^\circ\text{C}$  in water for 48 hours (Table 4 in manuscript).

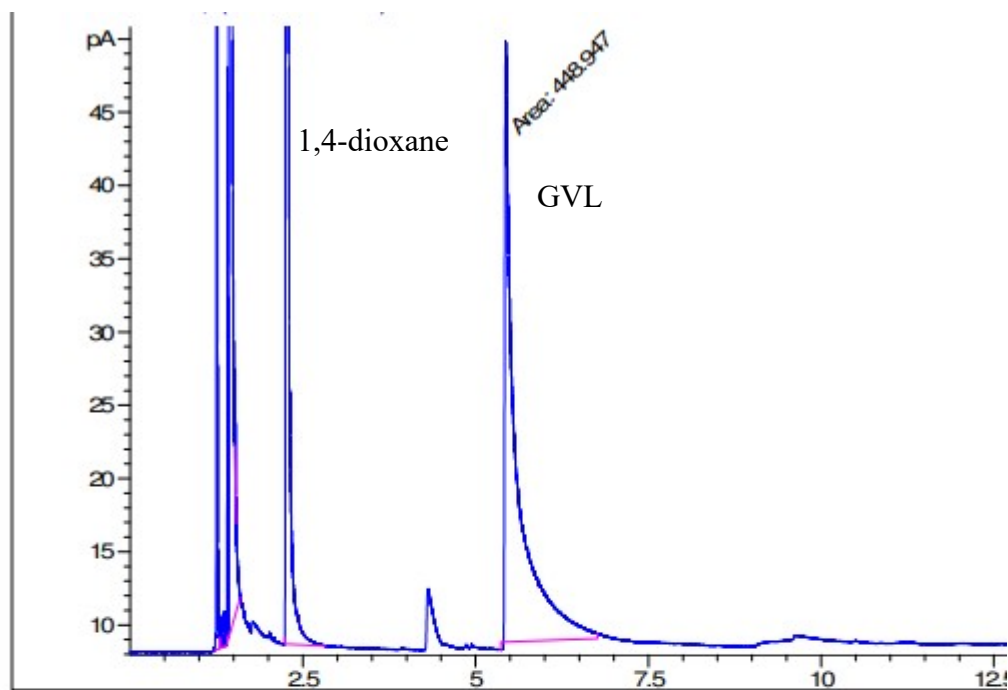


---



---

Area Percent Report

---



---

Sorted By : Signal  
 Calib. Data Modified : 12/8/2006 12:33:15 PM  
 Multiplier : 1.0000  
 Dilution : 1.0000  
 Use Multiplier & Dilution Factor with ISTDs

Signal 1: FID1 A,

| Peak # | RetTime [min] | Type | Width [min] | Area [pA*s] | Area %   | Name |
|--------|---------------|------|-------------|-------------|----------|------|
| 1      | 1.256         | BV   | 8.01e-3     | 114.89941   | 0.10618  | ?    |
| 2      | 1.316         | VV   | 0.0156      | 2.42280     | 0.00224  | ?    |
| 3      | 1.370         | VV   | 8.06e-3     | 1.22932     | 0.00114  | ?    |
| 4      | 1.413         | BV   | 8.33e-3     | 21.09981    | 0.01950  | ?    |
| 5      | 1.433         | VB S | 0.0145      | 1.04980e5   | 97.01040 | ?    |
| 6      | 1.523         | BB X | 9.18e-3     | 4.56623     | 0.00422  | ?    |
| 7      | 2.276         | HB   | 0.0176      | 2642.05371  | 2.44147  | ?    |
| 8      | 2.993         |      | 0.0000      | 0.00000     | 0.00000  | C14  |
| 9      | 3.466         |      | 0.0000      | 0.00000     | 0.00000  | C15  |
| 10     | 3.926         |      | 0.0000      | 0.00000     | 0.00000  | C16  |
| 11     | 5.434         | MM   | 0.1824      | 448.94739   | 0.41486  | ?    |

**Figure S15.** GC-FID of the reaction mixture of bamboo stem (91 mg) with 10.9 M of  $H_3PO_4(aq)$  and Ru-MACHO-BH (1.65 mg) under 30 bar  $H_2$  and 140 °C in water for 48 hours (Table 4 in manuscript).

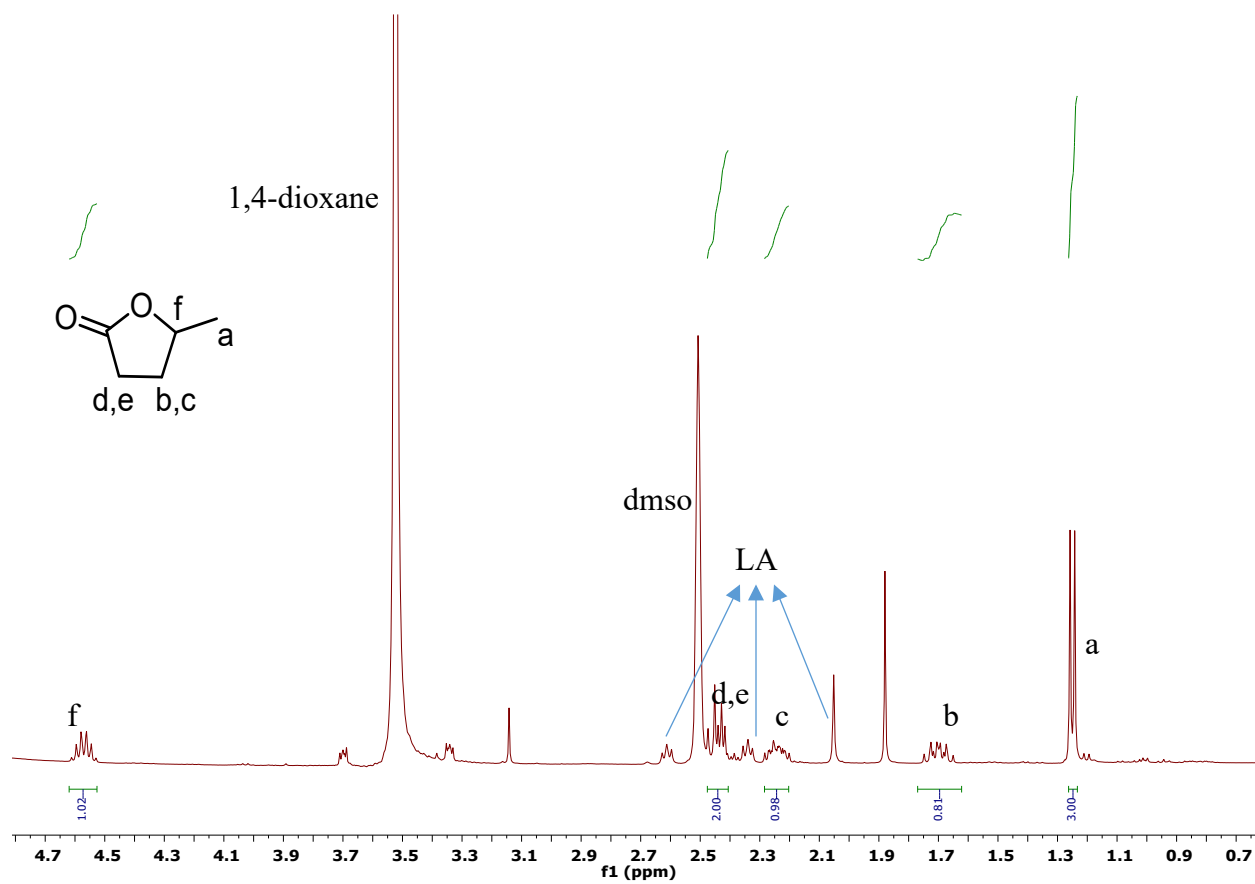

**Figure S16.**  $^1\text{H}$  NMR ( $\text{DMSO-d}_6$ , 400 MHz) of the crude reaction of bamboo stem (91 mg) with 10.9 M of  $\text{H}_3\text{PO}_4(\text{aq})$  and Ru-MACHO-BH (1.65 mg) under 30 bar  $\text{H}_2$  and 140  $^\circ\text{C}$  in water for 48 hours (Table 4 in manuscript).

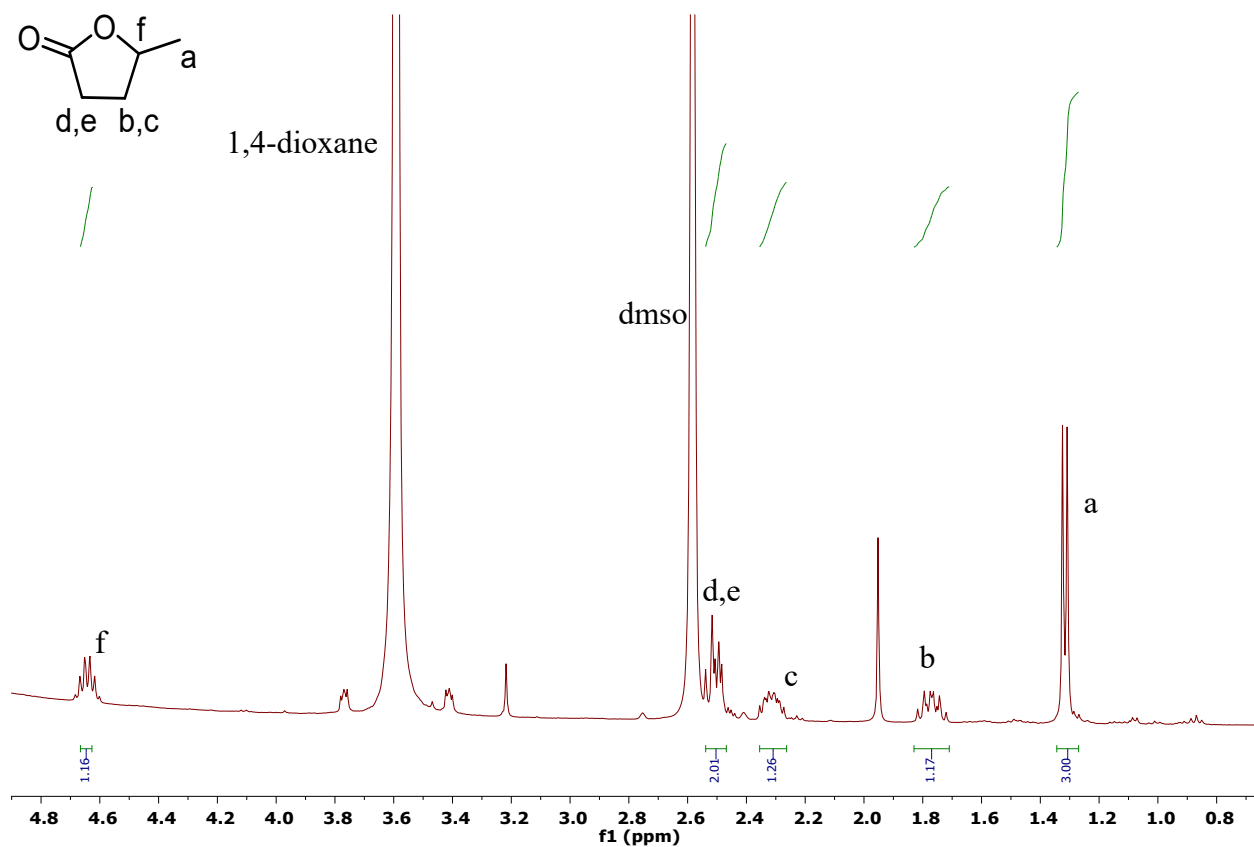

**Figure S17.** <sup>1</sup>H NMR (DMSO-d<sub>6</sub>, 400 MHz) of the crude reaction of bamboo stem (91 mg) with 10.9 M of H<sub>3</sub>PO<sub>4</sub>(aq) and Ru-MACHO-BH (1.65 mg) under 30 bar H<sub>2</sub> and 140 °C in water for 96 hours (Table 4 in manuscript).

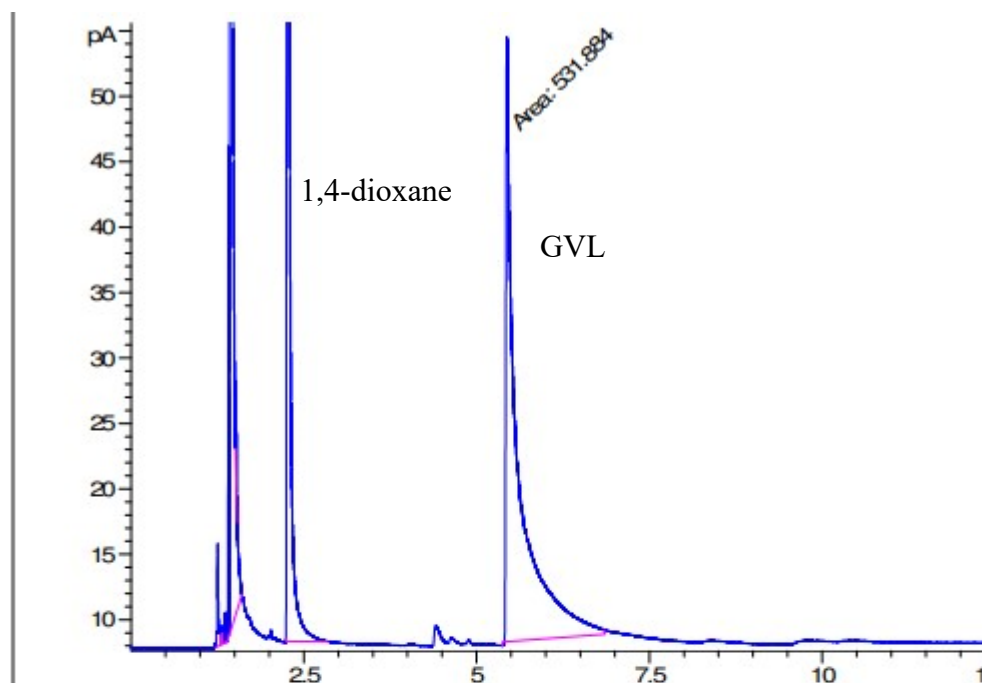


---



---

Area Percent Report

---



---

Sorted By : Signal  
 Calib. Data Modified : 12/8/2006 12:33:15 PM  
 Multiplier : 1.0000  
 Dilution : 1.0000  
 Use Multiplier & Dilution Factor with ISTDs

Signal 1: FID1 A,

| Peak # | RetTime [min] | Type | Width [min] | Area [pA*s] | Area %   | Name |
|--------|---------------|------|-------------|-------------|----------|------|
| 1      | 1.257         | EV   | 0.0142      | 8.14015     | 0.00760  | ?    |
| 2      | 1.307         | WV   | 8.56e-3     | 7.91185e-1  | 0.00074  | ?    |
| 3      | 1.319         | VB   | 0.0133      | 1.29824     | 0.00121  | ?    |
| 4      | 1.369         | BB   | 7.58e-3     | 1.06093     | 0.00099  | ?    |
| 5      | 1.412         | EV   | 8.60e-3     | 19.80924    | 0.01850  | ?    |
| 6      | 1.433         | VB S | 0.0143      | 1.04414e5   | 97.52235 | ?    |
| 7      | 1.523         | BB X | 9.46e-3     | 4.80699     | 0.00449  | ?    |
| 8      | 2.273         | HB   | 0.0175      | 2084.95435  | 1.94734  | ?    |
| 9      | 2.993         |      | 0.0000      | 0.00000     | 0.00000  | C14  |
| 10     | 3.466         |      | 0.0000      | 0.00000     | 0.00000  | C15  |
| 11     | 3.926         |      | 0.0000      | 0.00000     | 0.00000  | C16  |
| 12     | 5.435         | MM   | 0.1920      | 531.88446   | 0.49678  | ?    |

**Figure S18.** GC-FID of the reaction mixture of paper (91 mg) with 10.9 M of H<sub>3</sub>PO<sub>4</sub>(aq) and Ru-MACHO-BH (1.65 mg) under 30 bar H<sub>2</sub> and 140 °C in water for 48 hours (Table 4 in manuscript).

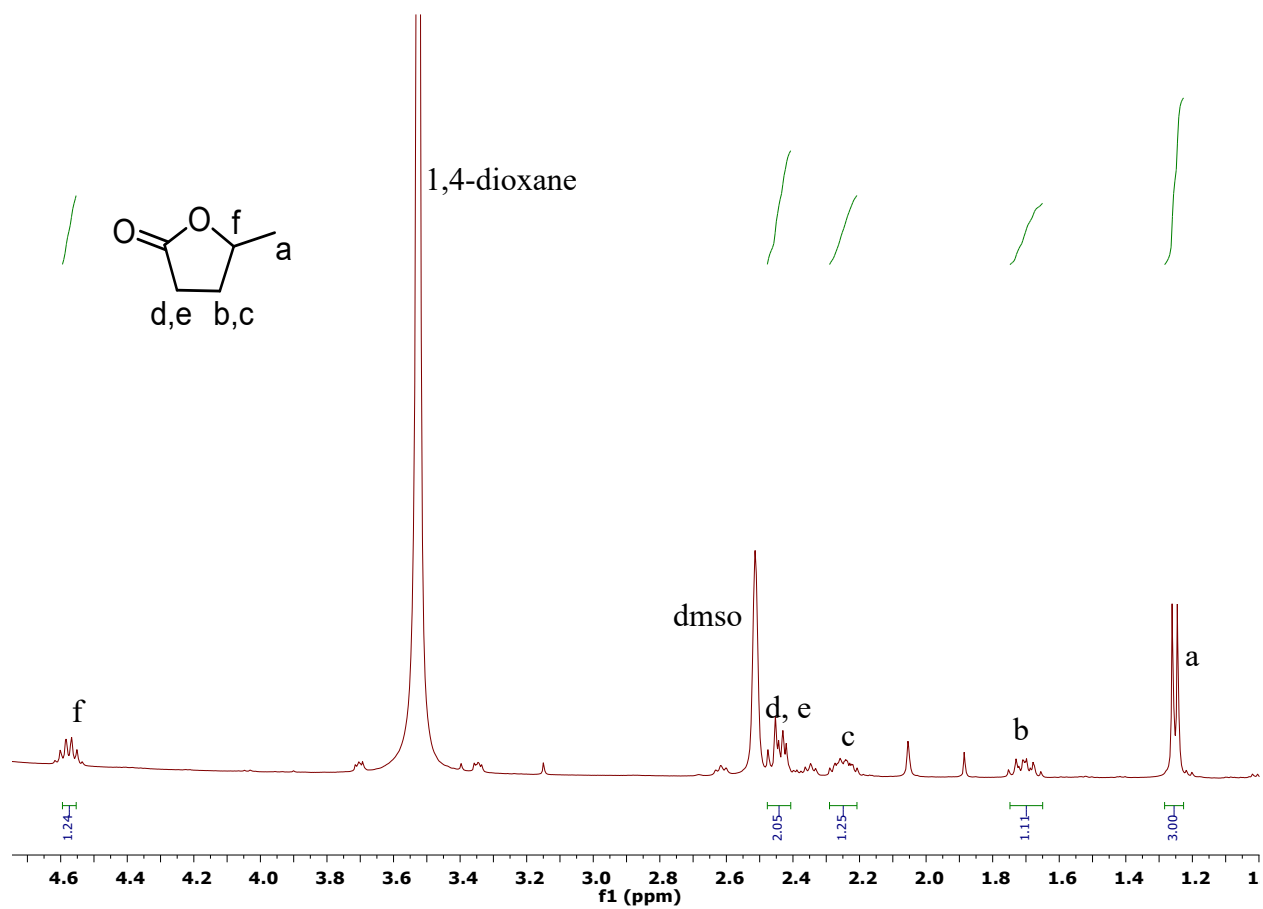

**Figure S19.** <sup>1</sup>H NMR (DMSO-d<sub>6</sub>, 400 MHz) of the crude reaction of paper (91 mg) with 10.9 M of H<sub>3</sub>PO<sub>4</sub>(aq) and Ru-MACHO-BH (1.65 mg) under 30 bar H<sub>2</sub> and 140 °C in water for 48 hours (Table 4 in manuscript).

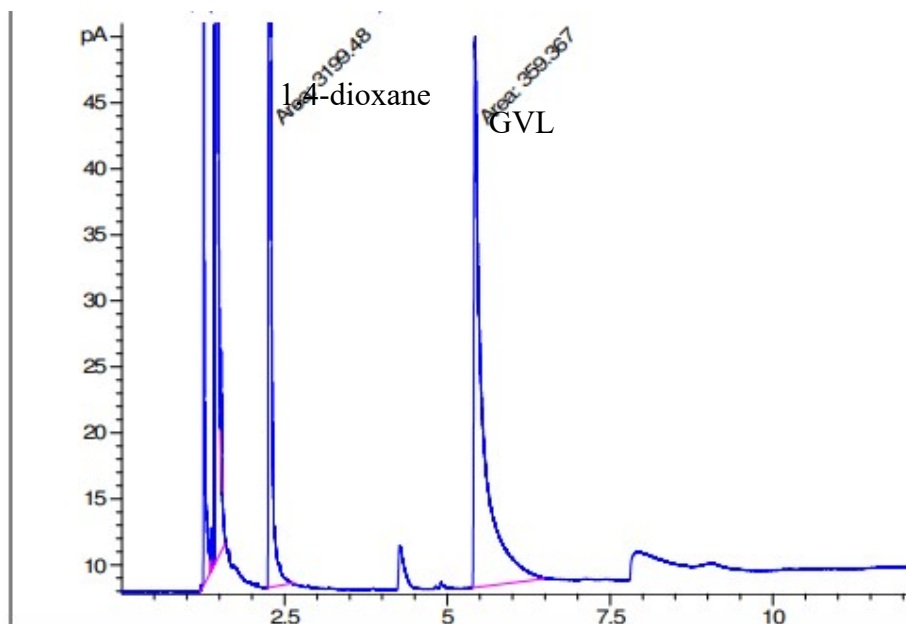


---



---

Area Percent Report

---



---

Sorted By : Signal  
 Calib. Data Modified : 12/8/2006 12:33:15 PM  
 Multiplier : 1.0000  
 Dilution : 1.0000  
 Use Multiplier & Dilution Factor with ISTDs

Signal 1: FID1 A,

| Peak # | RetTime [min] | Type | Width [min] | Area [pA*s] | Area %   | Name |
|--------|---------------|------|-------------|-------------|----------|------|
| 1      | 1.208         | BB   | 8.69e-3     | 2.49820e-1  | 0.00022  | ?    |
| 2      | 1.256         | BV   | 0.0101      | 73.56629    | 0.06408  | ?    |
| 3      | 1.369         | VV   | 0.0104      | 2.37678     | 0.00207  | ?    |
| 4      | 1.413         | VV   | 8.48e-3     | 22.61652    | 0.01970  | ?    |
| 5      | 1.433         | VB S | 0.0148      | 1.11096e5   | 96.76491 | ?    |
| 6      | 1.524         | BB X | 9.56e-3     | 5.10735     | 0.00445  | ?    |
| 7      | 2.280         | MM   | 0.0202      | 3199.48071  | 2.78677  | ?    |
| 8      | 2.993         |      | 0.0000      | 0.00000     | 0.00000  | C14  |
| 9      | 3.466         |      | 0.0000      | 0.00000     | 0.00000  | C15  |
| 10     | 3.926         |      | 0.0000      | 0.00000     | 0.00000  | C16  |
| 11     | 5.427         | MM   | 0.1435      | 359.36694   | 0.31301  | ?    |
| 12     | 19.115        | BB   | 0.0783      | 51.43044    | 0.04480  | ?    |

**Figure S20.** GC-FID of the reaction mixture of miscanthus grass (91 mg) with 10.9 M of H<sub>3</sub>PO<sub>4</sub>(aq) and Ru-MACHO-BH (1.65 mg) under 30 bar H<sub>2</sub> and 140 °C in water for 48 hours (Table 4 in manuscript).



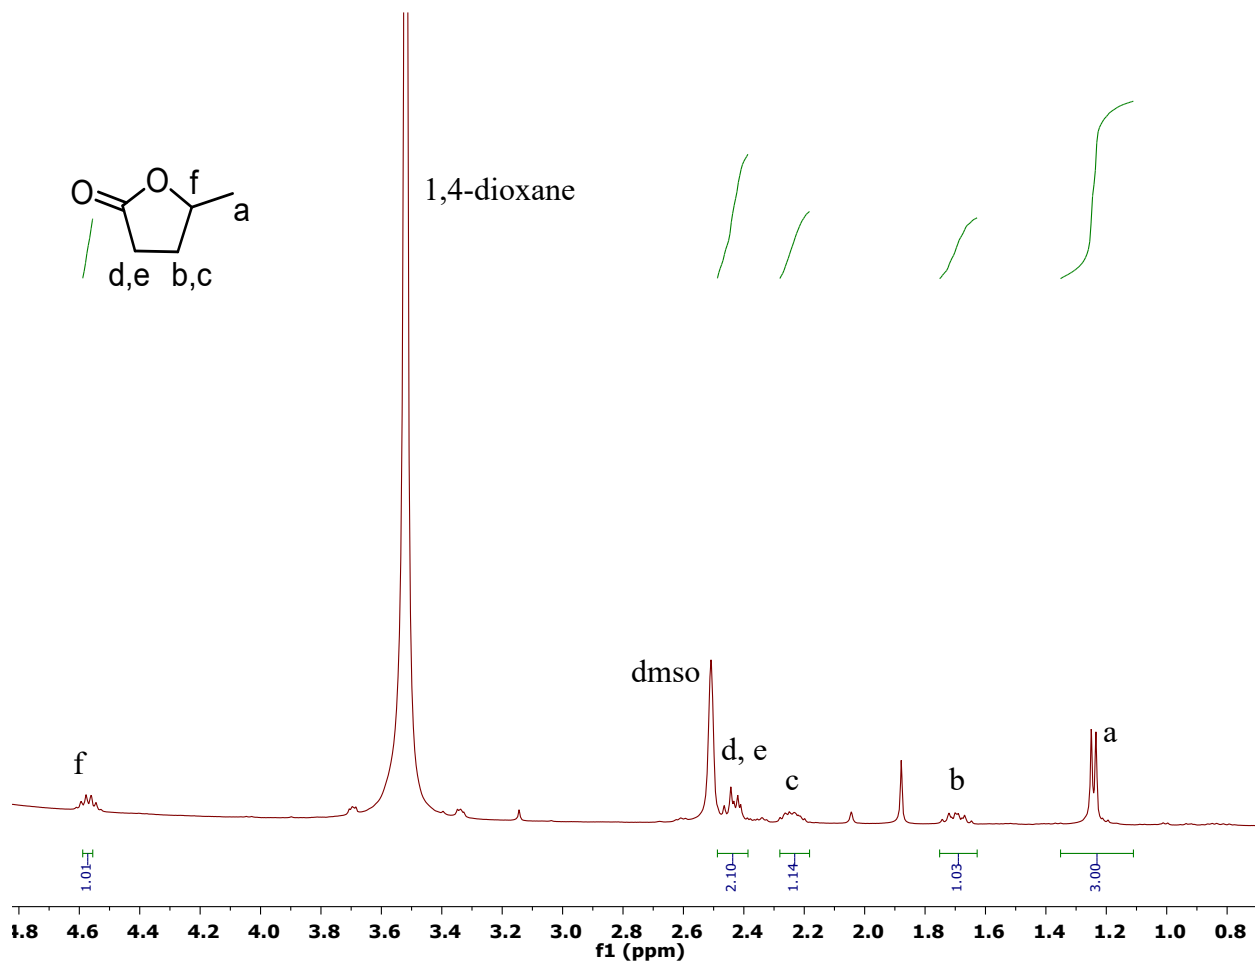

**Figure S21.** <sup>1</sup>H NMR (DMSO-d<sub>6</sub>, 400 MHz) of the crude reaction of miscanthus grass (91 mg) with 10.9 M of H<sub>3</sub>PO<sub>4</sub>(aq) and Ru-MACHO-BH (1.65 mg) under 30 bar H<sub>2</sub> and 140 °C in water for 48 hours (Table 4 in manuscript).

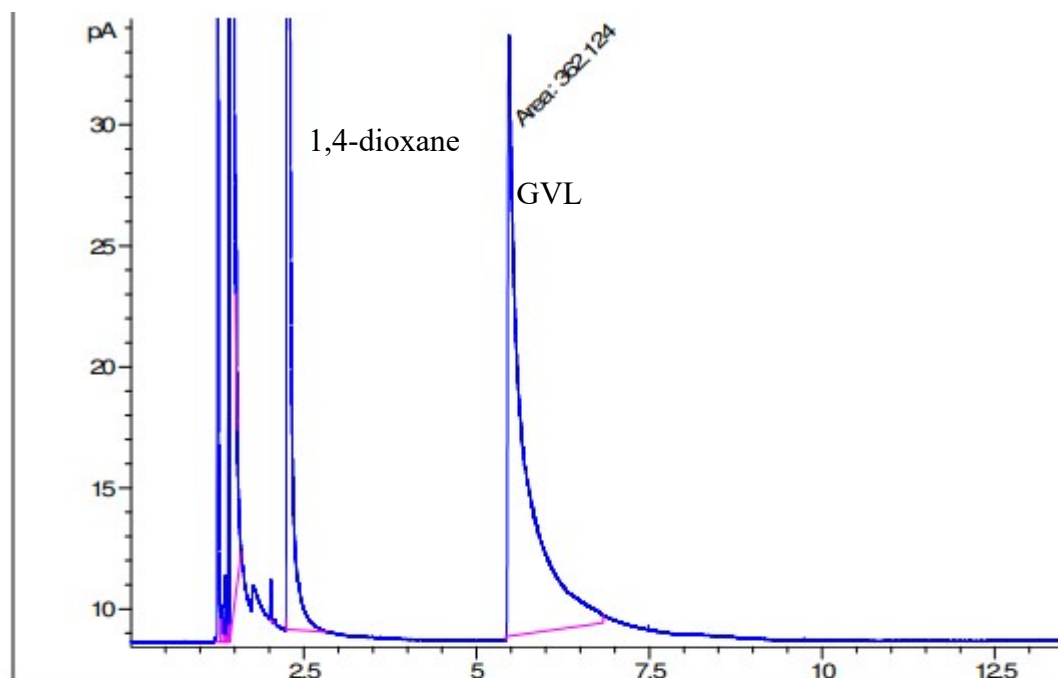


---



---

Area Percent Report

---



---

Sorted By : Signal  
 Calib. Data Modified : 12/8/2006 12:33:15 PM  
 Multiplier : 1.0000  
 Dilution : 1.0000  
 Use Multiplier & Dilution Factor with ISTDs

Signal 1: FID1 A,

| Peak # | RetTime [min] | Type | Width [min] | Area [pA*s] | Area %   | Name |
|--------|---------------|------|-------------|-------------|----------|------|
| 1      | 1.256         | BV   | 7.32e-3     | 203.24084   | 0.18245  | ?    |
| 2      | 1.308         | VV   | 0.0216      | 2.64006     | 0.00237  | ?    |
| 3      | 1.370         | VV   | 9.60e-3     | 1.78459     | 0.00160  | ?    |
| 4      | 1.413         | VV   | 8.53e-3     | 22.59807    | 0.02029  | ?    |
| 5      | 1.433         | VB S | 0.0144      | 1.08294e5   | 97.21673 | ?    |
| 6      | 1.524         | BB X | 9.42e-3     | 4.62379     | 0.00415  | ?    |
| 7      | 2.023         | BB   | 0.0164      | 1.80526     | 0.00162  | ?    |
| 8      | 2.275         | HB   | 0.0180      | 2501.60205  | 2.24571  | ?    |
| 9      | 2.993         |      | 0.0000      | 0.00000     | 0.00000  | C14  |
| 10     | 3.466         |      | 0.0000      | 0.00000     | 0.00000  | C15  |
| 11     | 3.926         |      | 0.0000      | 0.00000     | 0.00000  | C16  |
| 12     | 5.468         | MM   | 0.2432      | 362.12445   | 0.32508  | ?    |

**Figure S22.** GC-FID of the reaction mixture of pistachio shells (91 mg) with 10.9 M of  $H_3PO_4(aq)$  and Ru-MACHO-BH (1.65 mg) under 30 bar  $H_2$  and 140 °C in water after 72 hours (Table 4 in manuscript).

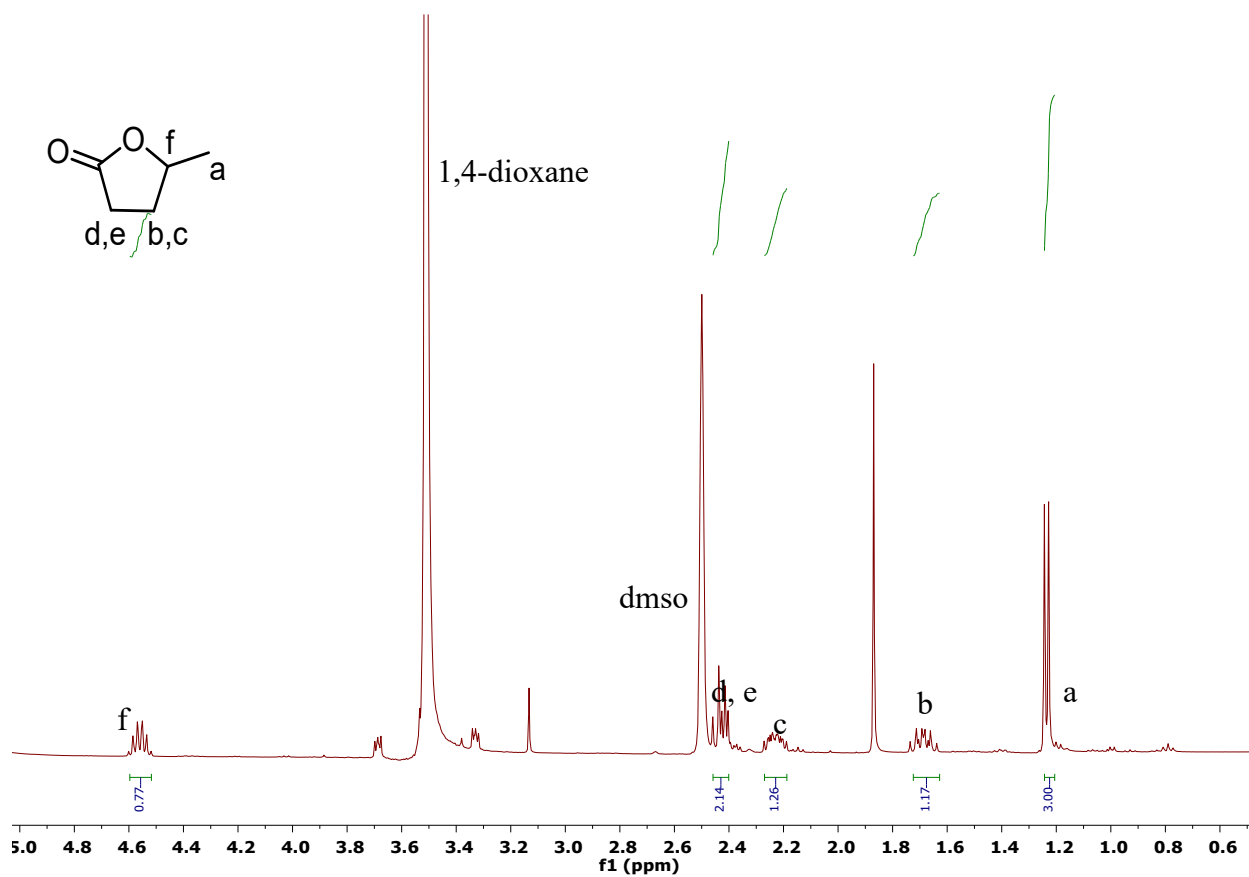

**Figure S23.** <sup>1</sup>H NMR (DMSO-d<sub>6</sub>, 400 MHz) of the crude reaction of pistachio shells (91 mg) with 10.9 M of H<sub>3</sub>PO<sub>4</sub>(aq) and Ru-MACHO-BH (1.65 mg) under 30 bar H<sub>2</sub> and 140 °C in water for 72 hours (Table 4 in manuscript).

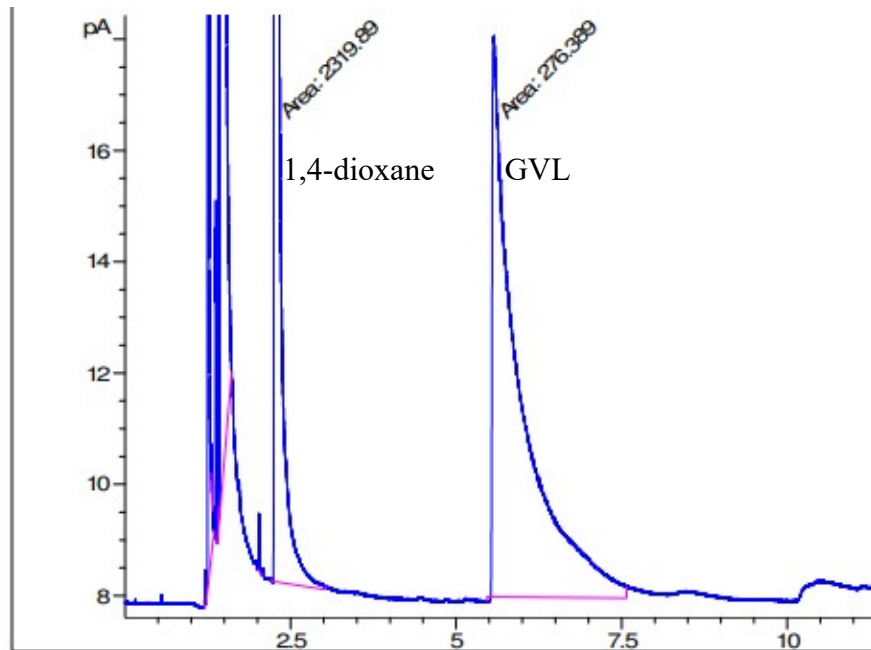


---



---

Area Percent Report

---



---

Sorted By : Signal  
 Calib. Data Modified : 12/8/2006 12:33:15 PM  
 Multiplier : 1.0000  
 Dilution : 1.0000  
 Use Multiplier & Dilution Factor with ISTDs

Signal 1: FID1 A,

| Peak # | RetTime [min] | Type | Width [min] | Area [pA*s] | Area %   | Name |
|--------|---------------|------|-------------|-------------|----------|------|
| 1      | 1.208         | BB   | 8.37e-3     | 3.49768e-1  | 0.00030  | ?    |
| 2      | 1.255         | BB S | 7.53e-3     | 356.68106   | 0.30155  | ?    |
| 3      | 1.307         | BB X | 0.0106      | 5.12615e-1  | 0.00043  | ?    |
| 4      | 1.371         | BB   | 8.28e-3     | 3.26983     | 0.00276  | ?    |
| 5      | 1.412         | BV   | 8.37e-3     | 22.13661    | 0.01871  | ?    |
| 6      | 1.432         | VB S | 0.0150      | 1.15298e5   | 97.47626 | ?    |
| 7      | 1.523         | BB X | 9.43e-3     | 4.75673     | 0.00402  | ?    |
| 8      | 2.026         | BB   | 0.0171      | 1.16840     | 0.00099  | ?    |
| 9      | 2.277         | MM   | 0.0194      | 2319.88721  | 1.96131  | ?    |
| 10     | 2.993         |      | 0.0000      | 0.00000     | 0.00000  | C14  |
| 11     | 3.466         |      | 0.0000      | 0.00000     | 0.00000  | C15  |
| 12     | 3.926         |      | 0.0000      | 0.00000     | 0.00000  | C16  |
| 13     | 5.572         | MM   | 0.4569      | 276.38931   | 0.23367  | ?    |

Totals : 1.18283e5

**Figure S24.** GC-FID of the reaction mixture of banana peel (91 mg) with 10.9 M of  $H_3PO_4(aq)$  and Ru-MACHO-BH (1.65 mg) under 30 bar  $H_2$  and 140 °C in water after 96 hours (Table 4 in manuscript).

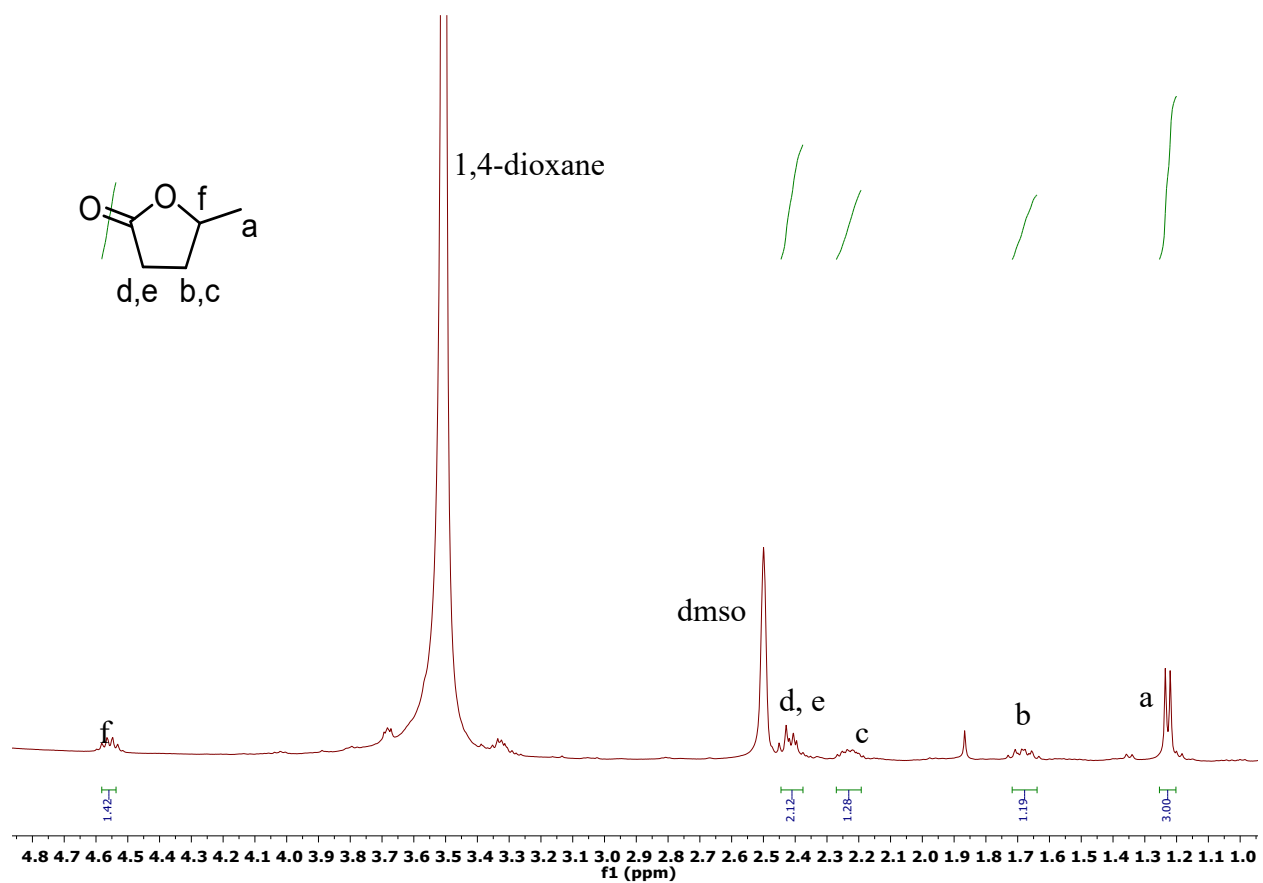

**Figure S25.** <sup>1</sup>H NMR (DMSO-d<sub>6</sub>, 400 MHz) of the crude reaction of banana peel (91 mg) with 10.9 M of H<sub>3</sub>PO<sub>4</sub>(aq) and Ru-MACHO-BH (1.65 mg) under 30 bar H<sub>2</sub> and 140 °C in water for 96 hours (Table 4 in manuscript).

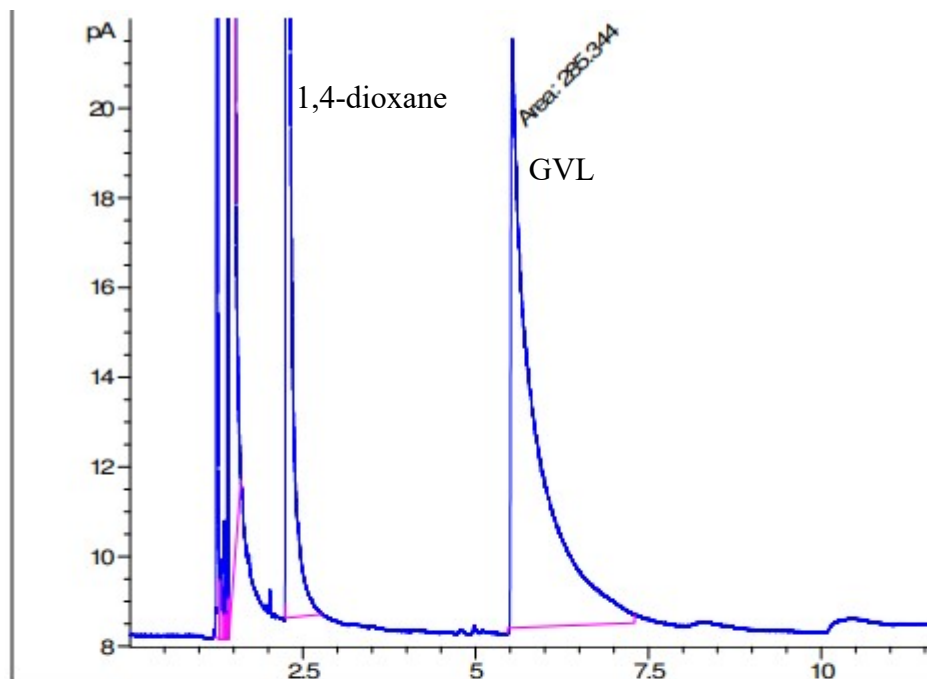


---



---

Area Percent Report

---



---

Sorted By : Signal  
 Calib. Data Modified : 12/8/2006 12:33:15 PM  
 Multiplier : 1.0000  
 Dilution : 1.0000  
 Use Multiplier & Dilution Factor with ISTDs

Signal 1: FID1 A,

| Peak # | RetTime [min] | Type | Width [min] | Area [pA*s] | Area %   | Name |
|--------|---------------|------|-------------|-------------|----------|------|
| 1      | 1.256         | BV   | 7.21e-3     | 196.77211   | 0.17131  | ?    |
| 2      | 1.308         | W    | 0.0249      | 3.56810     | 0.00311  | ?    |
| 3      | 1.370         | W    | 0.0120      | 2.26136     | 0.00197  | ?    |
| 4      | 1.413         | W    | 8.61e-3     | 20.91136    | 0.01821  | ?    |
| 5      | 1.432         | VB S | 0.0150      | 1.12096e5   | 97.58983 | ?    |
| 6      | 1.524         | BB X | 9.12e-3     | 4.52648     | 0.00394  | ?    |
| 7      | 2.276         | HB   | 0.0174      | 2255.04639  | 1.96323  | ?    |
| 8      | 2.993         |      | 0.0000      | 0.00000     | 0.00000  | C14  |
| 9      | 3.466         |      | 0.0000      | 0.00000     | 0.00000  | C15  |
| 10     | 3.926         |      | 0.0000      | 0.00000     | 0.00000  | C16  |
| 11     | 5.529         | MM   | 0.3617      | 285.34384   | 0.24842  | ?    |

**Figure S26.** GC-FID of the reaction mixture of potato peel (91 mg) with 10.9 M of H<sub>3</sub>PO<sub>4</sub>(aq) and Ru-MACHO-BH (1.65 mg) under 30 bar H<sub>2</sub> and 140 °C in water after 72 hours (Table 4 in manuscript).

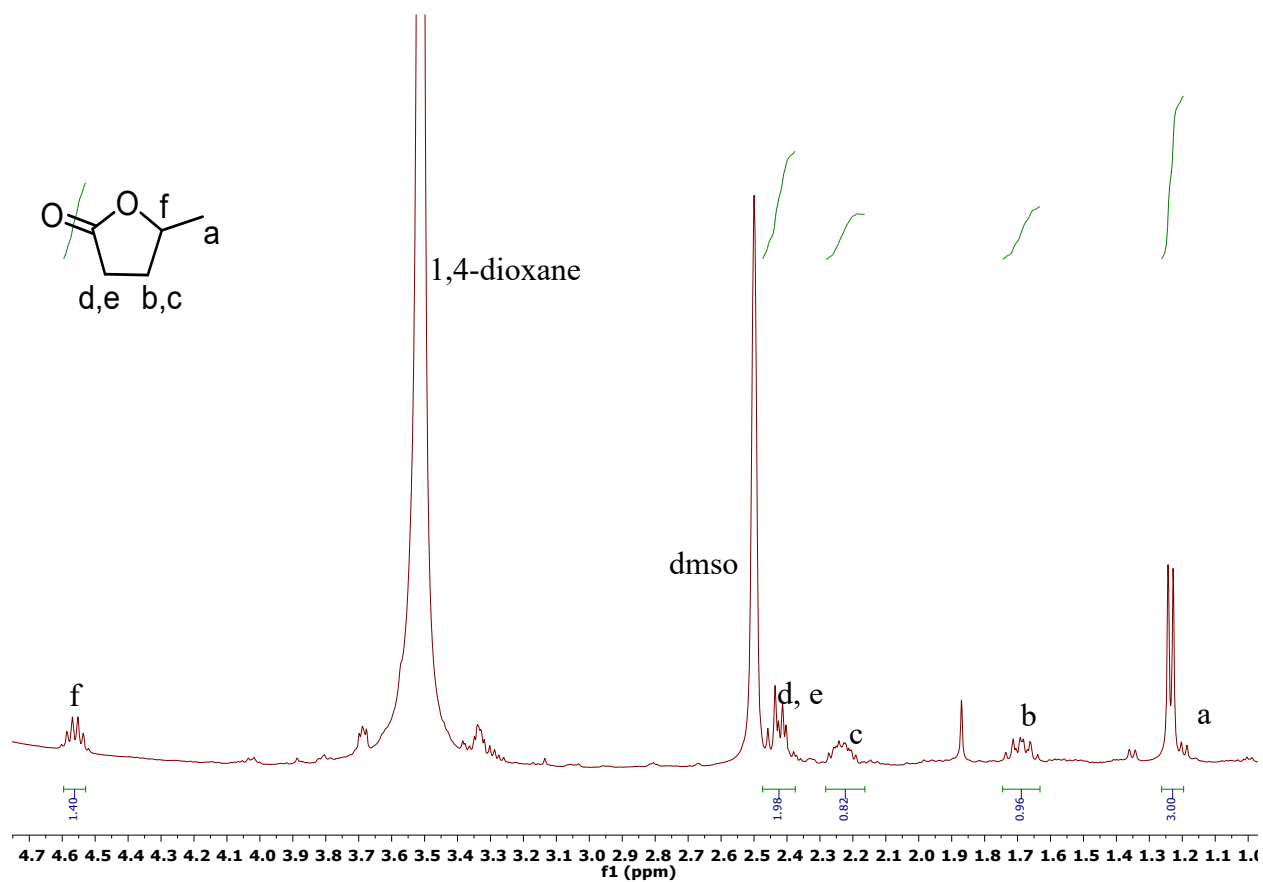

**Figure S27.**  $^1\text{H}$  NMR (DMSO- $d_6$ , 400 MHz) of the crude reaction of potato peel (91 mg) with 10.9 M of  $\text{H}_3\text{PO}_4(\text{aq})$  and Ru-MACHO-BH (1.65 mg) under 30 bar  $\text{H}_2$  and 140  $^\circ\text{C}$  in water for 72 hours (Table 4 in manuscript).

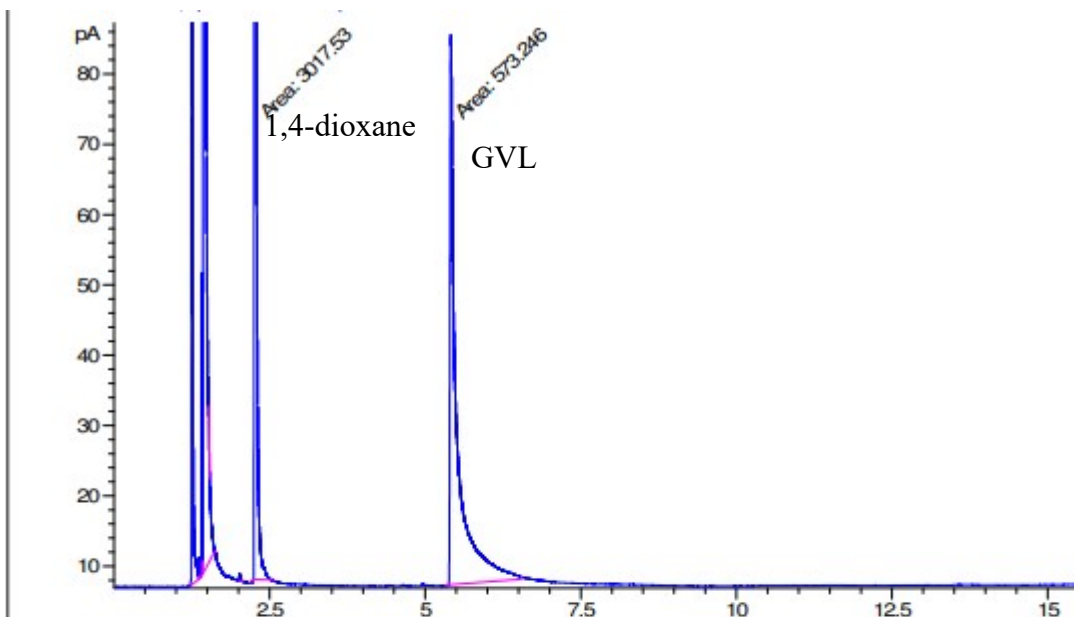

Area Percent Report

Sorted By : Signal  
 Calib. Data Modified : 12/8/2006 12:33:15 PM  
 Multiplier : 1.0000  
 Dilution : 1.0000  
 Use Multiplier & Dilution Factor with ISTDs

Signal 1: FID1 A,

| Peak # | RetTime [min] | Type | Width [min] | Area [pA*s] | Area %   | Name |
|--------|---------------|------|-------------|-------------|----------|------|
| 1      | 1.255         | BV   | 9.37e-3     | 296.92310   | 0.22451  | ?    |
| 2      | 1.369         | VB   | 9.51e-3     | 1.89549     | 0.00143  | ?    |
| 3      | 1.412         | BV   | 9.39e-3     | 25.52670    | 0.01930  | ?    |
| 4      | 1.432         | VB S | 0.0161      | 1.28332e5   | 97.03557 | ?    |
| 5      | 1.522         | BB X | 0.0108      | 4.24467     | 0.00321  | ?    |
| 6      | 2.023         | BB   | 0.0176      | 1.17273     | 0.00089  | ?    |
| 7      | 2.280         | MM   | 0.0209      | 3017.52808  | 2.28164  | ?    |
| 8      | 2.993         |      | 0.0000      | 0.00000     | 0.00000  | C14  |
| 9      | 3.466         |      | 0.0000      | 0.00000     | 0.00000  | C15  |
| 10     | 3.926         |      | 0.0000      | 0.00000     | 0.00000  | C16  |
| 11     | 5.411         | MM   | 0.1221      | 573.24591   | 0.43345  | ?    |

Totals : 1.32253e5

**Figure S28.** GC-FID of the reaction mixture of rice grains (91 mg) with 10.9 M of H<sub>3</sub>PO<sub>4</sub> and Ru-MACHO-BH (1.65 mg) under 30 bar H<sub>2</sub> and 140 °C in water for 72 hours (Table 5 in manuscript).



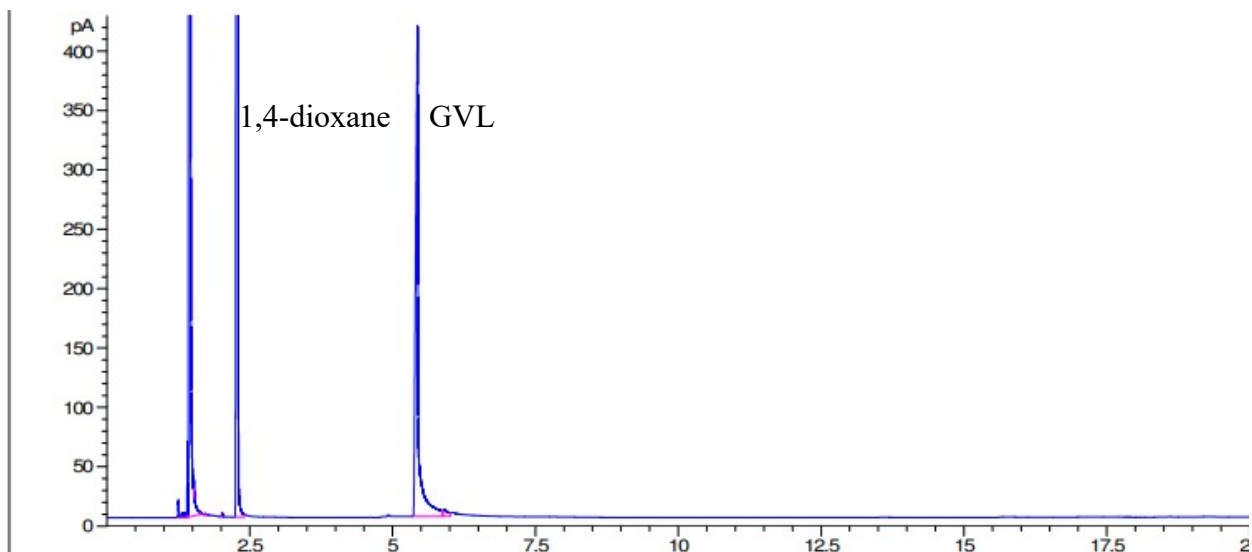


---



---

Area Percent Report

---



---

Sorted By : Signal  
 Calib. Data Modified : 12/8/2006 12:33:15 PM  
 Multiplier : 1.0000  
 Dilution : 1.0000  
 Use Multiplier & Dilution Factor with ISTDs

Signal 1: FID1 A,

| Peak # | RetTime [min] | Type | Width [min] | Area [pA*s] | Area %   | Name |
|--------|---------------|------|-------------|-------------|----------|------|
| 1      | 1.255         | BB   | 0.0100      | 10.00459    | 0.00536  | ?    |
| 2      | 1.316         | BB   | 0.0147      | 3.70818     | 0.00199  | ?    |
| 3      | 1.368         | BB   | 7.96e-3     | 2.03438     | 0.00109  | ?    |
| 4      | 1.411         | BV   | 8.68e-3     | 36.07652    | 0.01932  | ?    |
| 5      | 1.432         | VB S | 0.0190      | 1.79040e5   | 95.89713 | ?    |
| 6      | 1.526         | BB X | 9.07e-3     | 7.12259     | 0.00381  | ?    |
| 7      | 1.630         | BB X | 9.42e-3     | 2.87165e-1  | 0.00015  | ?    |
| 8      | 1.724         | BB   | 0.0369      | 3.21941     | 0.00172  | ?    |
| 9      | 2.021         | BB   | 0.0176      | 3.45120     | 0.00185  | ?    |
| 10     | 2.294         | HH   | 0.0217      | 6137.80908  | 3.28753  | ?    |
| 11     | 2.993         |      | 0.0000      | 0.00000     | 0.00000  | C14  |
| 12     | 3.466         |      | 0.0000      | 0.00000     | 0.00000  | C15  |
| 13     | 3.926         |      | 0.0000      | 0.00000     | 0.00000  | C16  |
| 14     | 5.434         | HH   | 0.0439      | 1424.71912  | 0.76311  | ?    |
| 15     | 5.900         | HH   | 0.0656      | 31.61740    | 0.01693  | ?    |

Totals : 1.86700e5

**Figure S29.** GC-FID of the reaction mixture of potato flour (91 mg) with 10.9 M of  $H_3PO_4$  and Ru-MACHO-BH (1.65 mg) under 30 bar  $H_2$  and 140 °C in water for 72 hours (Table 5 in manuscript).

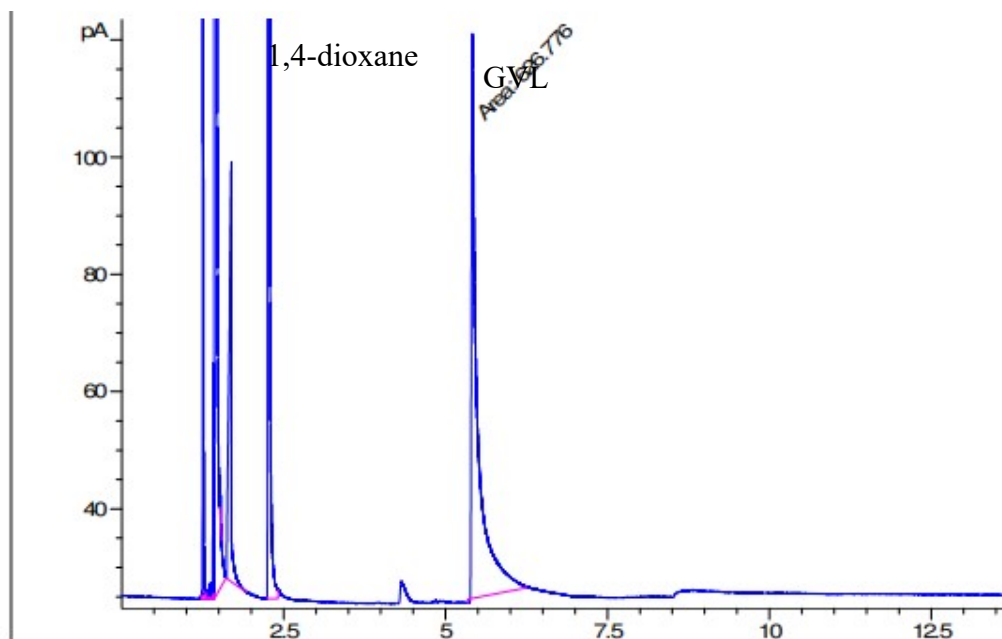


---



---

Area Percent Report

---



---

Sorted By : Signal  
 Calib. Data Modified : 12/8/2006 12:33:15 PM  
 Multiplier : 1.0000  
 Dilution : 1.0000  
 Use Multiplier & Dilution Factor with ISTDs

Signal 1: FID1 A,

| Peak # | RetTime [min] | Type | Width [min] | Area [pA*s] | Area %   | Name |
|--------|---------------|------|-------------|-------------|----------|------|
| 1      | 1.238         | BV   | 7.60e-3     | 6.41491e-1  | 0.00053  | ?    |
| 2      | 1.256         | VV   | 7.59e-3     | 183.67702   | 0.15249  | ?    |
| 3      | 1.308         | VV   | 0.0215      | 2.76684     | 0.00230  | ?    |
| 4      | 1.370         | VV   | 0.0101      | 1.84508     | 0.00153  | ?    |
| 5      | 1.413         | VV   | 8.82e-3     | 23.41998    | 0.01944  | ?    |
| 6      | 1.433         | VB S | 0.0149      | 1.16551e5   | 96.76067 | ?    |
| 7      | 1.524         | BB X | 9.67e-3     | 5.00796     | 0.00416  | ?    |
| 8      | 1.694         | BB   | 0.0328      | 188.25348   | 0.15629  | ?    |
| 9      | 2.280         | HH   | 0.0182      | 2869.48584  | 2.38224  | ?    |
| 10     | 2.993         |      | 0.0000      | 0.00000     | 0.00000  | C14  |
| 11     | 3.466         |      | 0.0000      | 0.00000     | 0.00000  | C15  |
| 12     | 3.926         |      | 0.0000      | 0.00000     | 0.00000  | C16  |
| 13     | 5.413         | MM   | 0.1085      | 626.77557   | 0.52035  | ?    |

**Figure S30.** GC-FID of the reaction mixture of chitin (0.6 mmol) with 10.9 M of H<sub>3</sub>PO<sub>4</sub>(aq) and Ru-MACHO-BH (1.65 mg) under 30 bar H<sub>2</sub> and 140 °C in water for 96 hours (Table 4 in manuscript).

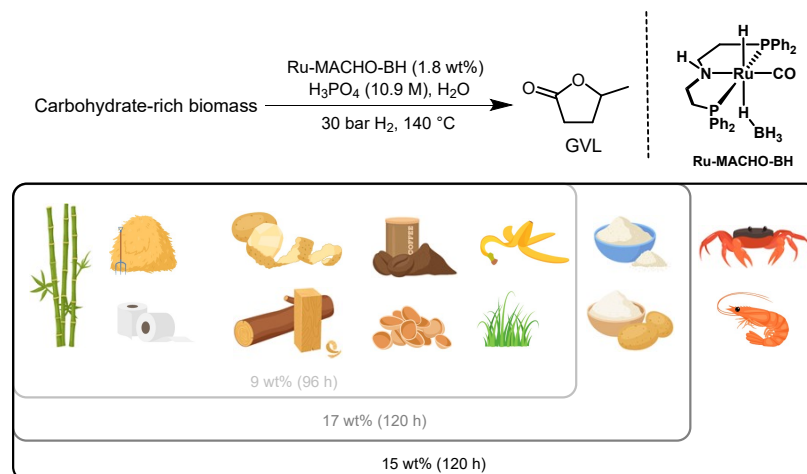

**Figure S31.** Conversion of carbohydrate-rich biomass to GVL by the Ru-MACHO-BH/  $\text{H}_3\text{PO}_4(\text{aq})/\text{H}_2$  system. Yields are calculated corresponding to the moles of cellulose and hemicellulose.

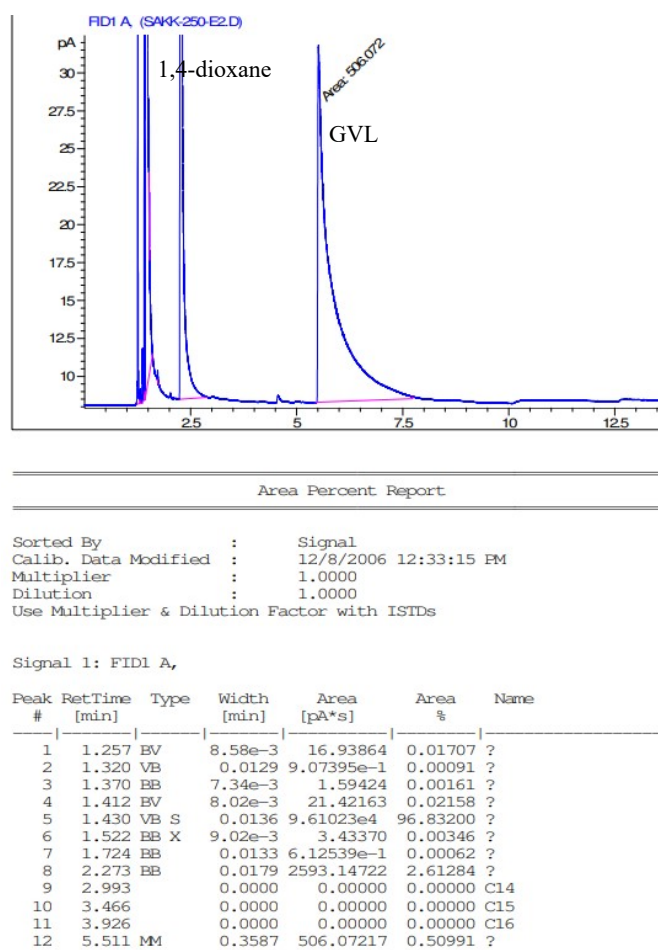

**Figure S32.** GC-FID of the crude reaction of mixing all eleven substrates (lignocellulosic biomass along with starchy biomass) with 10.9 M of  $\text{H}_3\text{PO}_4(\text{aq})$  and Ru-MACHO-BH (1.65 mg) under 30 bar  $\text{H}_2$  and 140 °C in water for 120 hours (Fig. 2 in manuscript).

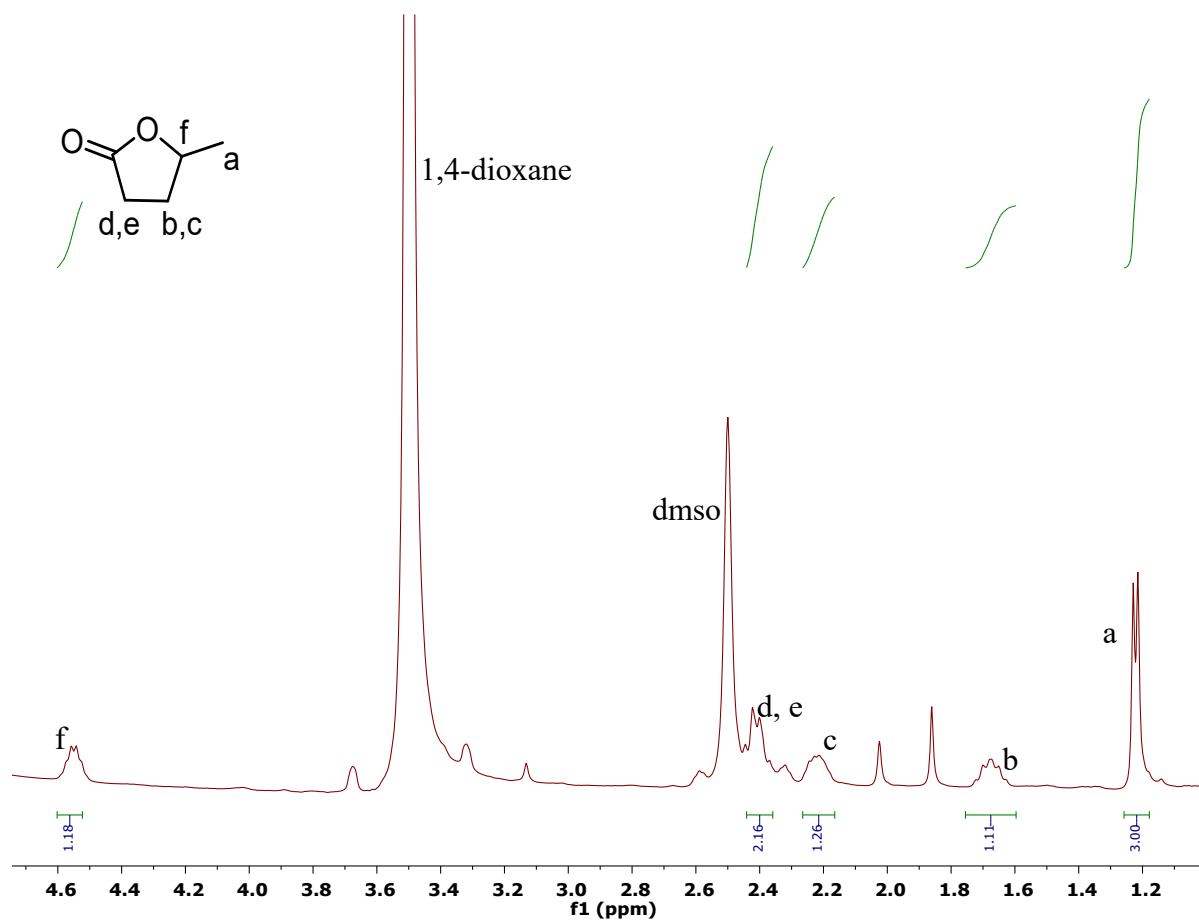

**Figure S33.**  $^1\text{H}$  NMR (DMSO- $d_6$ , 400 MHz) of the crude reaction of mixing all eleven substrates (lignocellulosic biomass along with starchy biomass) with 10.9 M of  $\text{H}_3\text{PO}_4(\text{aq})$  and Ru-MACHO-BH (1.65 mg) under 30 bar  $\text{H}_2$  and 140  $^\circ\text{C}$  in water for 120 hours.

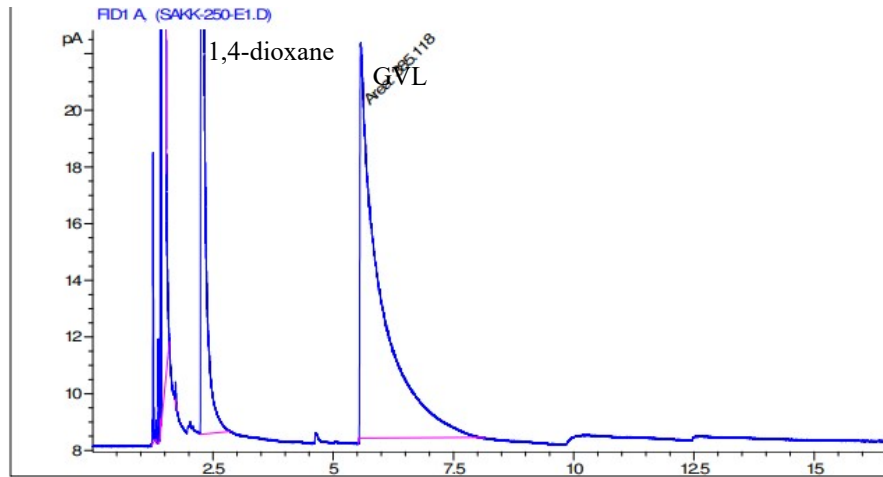


---

Area Percent Report

---

Sorted By : Signal  
 Calib. Data Modified : 12/8/2006 12:33:15 PM  
 Multiplier : 1.0000  
 Dilution : 1.0000  
 Use Multiplier & Dilution Factor with ISTDs

Signal 1: FID1 A,

| Peak # | RetTime [min] | Type | Width [min] | Area [pA*s] | Area %   | Name |
|--------|---------------|------|-------------|-------------|----------|------|
| 1      | 1.258         | BB   | 9.57e-3     | 6.28510     | 0.00609  | ?    |
| 2      | 1.320         | BB   | 7.94e-3     | 3.52435e-1  | 0.00034  | ?    |
| 3      | 1.370         | BV   | 7.68e-3     | 1.77256     | 0.00172  | ?    |
| 4      | 1.411         | BV   | 7.97e-3     | 21.84990    | 0.02118  | ?    |
| 5      | 1.430         | VB S | 0.0141      | 1.00568e5   | 97.46867 | ?    |
| 6      | 1.522         | BB X | 9.02e-3     | 3.63259     | 0.00352  | ?    |
| 7      | 1.725         | BB   | 0.0134      | 6.24076e-1  | 0.00060  | ?    |
| 8      | 2.271         | BB   | 0.0176      | 2192.19141  | 2.12463  | ?    |
| 9      | 2.993         |      | 0.0000      | 0.00000     | 0.00000  | C14  |
| 10     | 3.466         |      | 0.0000      | 0.00000     | 0.00000  | C15  |
| 11     | 3.926         |      | 0.0000      | 0.00000     | 0.00000  | C16  |
| 12     | 5.569         | MM   | 0.4607      | 385.11813   | 0.37325  | ?    |

**Figure S34.** GC-FID of the crude reaction of mixing all eleven substrates (lignocellulosic, starchy and chitin biomass) with 10.9 M of H<sub>3</sub>PO<sub>4</sub>(aq) and Ru-MACHO-BH (1.65 mg) under 30 bar H<sub>2</sub> and 140 °C in water for 120 hours.

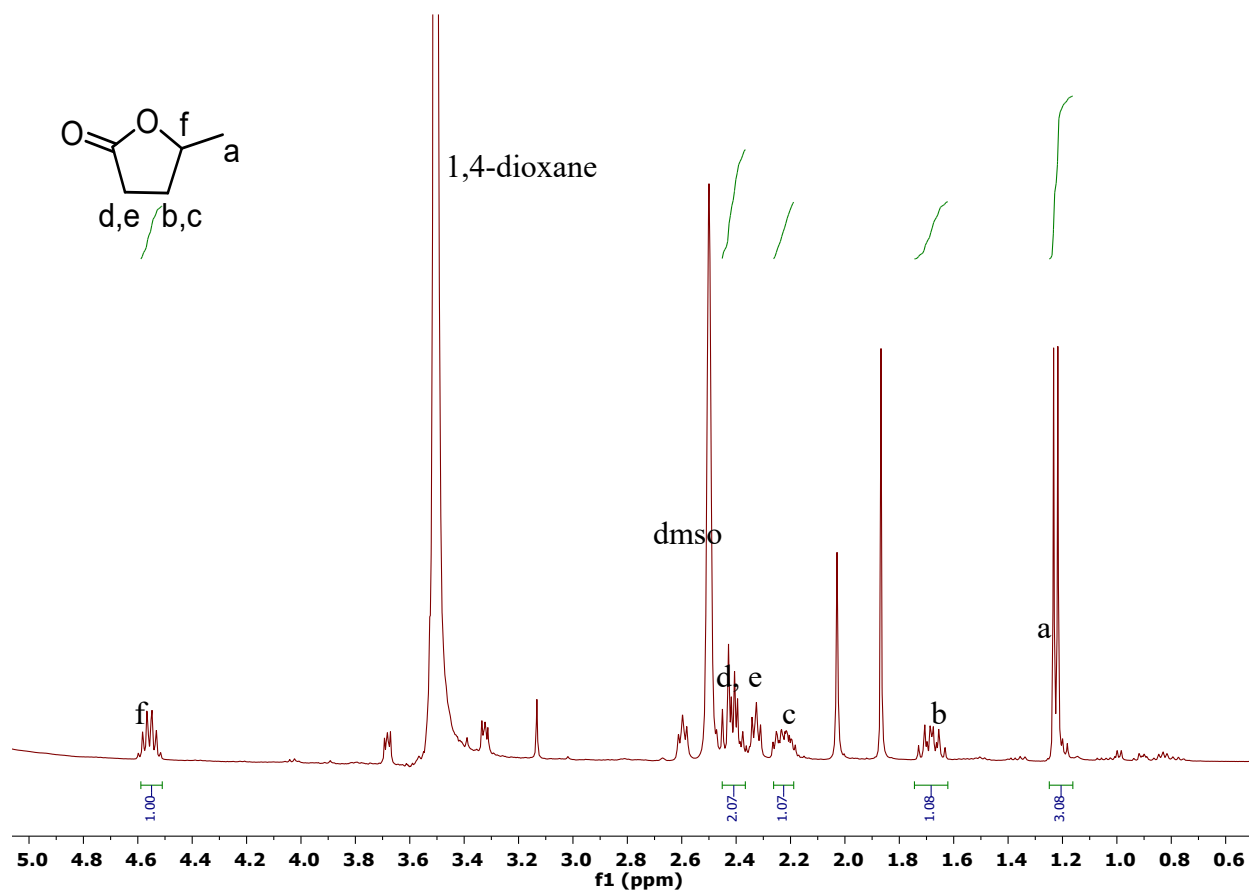

**Figure S35.** <sup>1</sup>H NMR (DMSO-d<sub>6</sub>, 400 MHz) of the crude reaction of mixing all twelve substrates (lignocellulosic, starchy and chitin biomass) with 10.9 M of H<sub>3</sub>PO<sub>4</sub>(aq) and Ru-MACHO-BH (1.65 mg) under 30 bar H<sub>2</sub> and 140 °C in water for 120 hours.

# Gas phase analysis by MicroGC

## External Standard Report

Page 1 of 2 (13)

Method Name: C:\Users\Administrator\Agilent\Method\20190717\_Luca\_Final.met  
 Data: C:\Users\Administrator\Agilent\Result\148\_sakk-109\_2021-11-15 13-43-35 (GMT +01-00).dat.rslt\148\_sakk-109\_2021-11-15 14-33-40 (GMT +01-00)-Rep7.dat  
 User: SYSTEM (SYSTEM)  
 Acquired: 11/15/2021 2:34:28 PM (GMT +01:00)  
 Printed: 11/15/2021 2:42:09 PM (GMT +01:00)

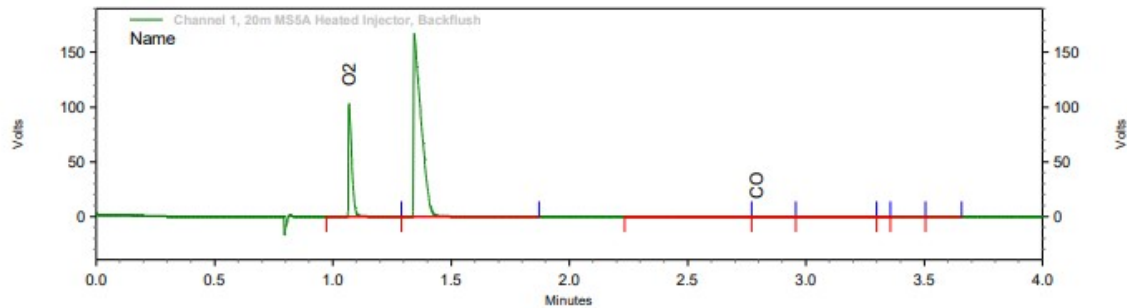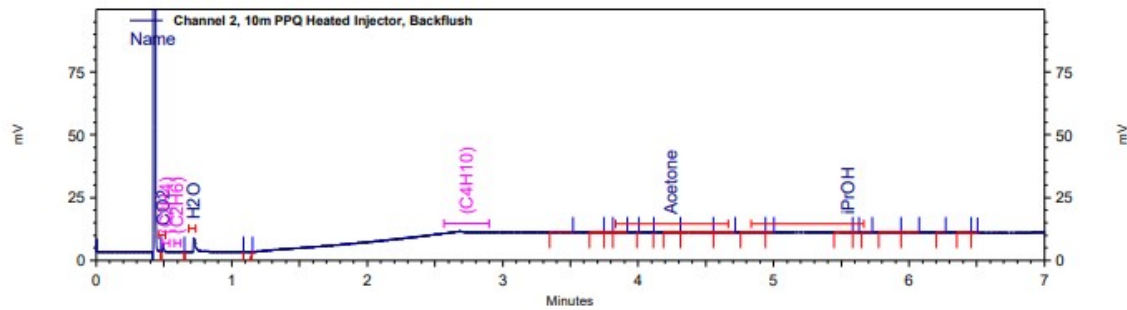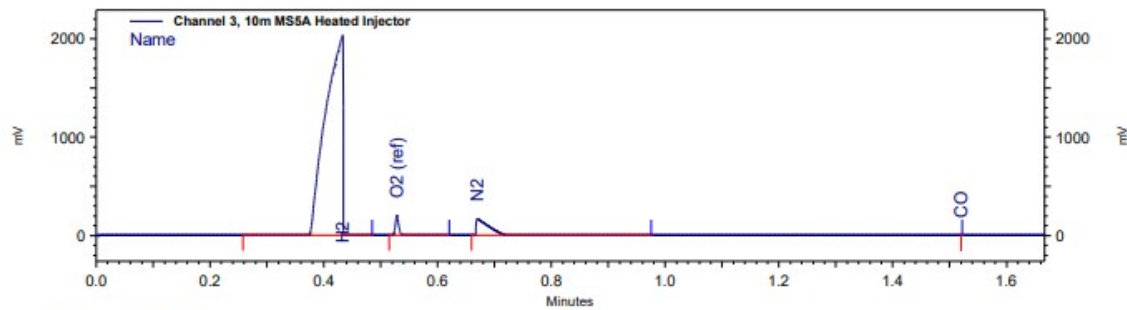

Channel 1, 20m  
MS5A Heated  
Injector, Backflush  
Results

| Pk # | Name | Retention Time | Area    | Concentration |
|------|------|----------------|---------|---------------|
| 1    | O2   | 1.1            | 9718633 | 9.0           |
|      | N2   |                |         | 0.0 BDL       |
|      | CH4  |                |         | 0.0 BDL       |
| 4    | CO   | 2.8            | 1256    | 0.0           |

**External Standard Report**

Method Name: C:\Users\Administrator\Agilent\Method\20190717\_Luca\_Final.met  
 Data: C:\Users\Administrator\Agilent\Result\148\_sakk-109\_2021-11-15 13-43-35 (GMT +01-00).dat.rslt\148\_sakk-109\_2021-11-15 15-07-19 (GMT +01-00)-Rep11.dat  
 User: SYSTEM (SYSTEM)  
 Acquired: 11/15/2021 3:08:06 PM (GMT +01:00)  
 Printed: 11/15/2021 3:15:40 PM (GMT +01:00)

|        |  |  |         |     |
|--------|--|--|---------|-----|
| Totals |  |  | 8750365 | 8.1 |
|--------|--|--|---------|-----|

Channel 2, 10m  
 PPQ Heated  
 Injector, Backflush

Results

| Pk # | Name    | Retention Time | Area      | Concentration |
|------|---------|----------------|-----------|---------------|
| 2    | CO2     | 0.5            | 160760958 | 78.5          |
|      | C2H4    |                |           | 0.0 BDL       |
|      | C2H6    |                |           | 0.0 BDL       |
| 3    | H2O     | 0.7            | 186150748 | 2729.0        |
|      | C4H10   |                |           | 0.0 BDL       |
| 12   | Acetone | 4.3            | 624       | 0.0           |
| 20   | iPrOH   | 5.3            | 222       | 0.0           |

|        |  |  |           |        |
|--------|--|--|-----------|--------|
| Totals |  |  | 346912552 | 2807.6 |
|--------|--|--|-----------|--------|

Channel 3, 10m  
 MSSA Heated  
 Injector Results

| Pk # | Name     | Retention Time | Area      | Concentration |
|------|----------|----------------|-----------|---------------|
| 1    | H2       | 0.4            | 454464004 | 59.8          |
| 2    | O2 (ref) | 0.5            | 7356593   | 7.7           |
| 3    | N2       | 0.7            | 22241869  | 30.9          |
| 4    | CO       | 1.5            | 15        | 0.0           |

|        |  |  |           |      |
|--------|--|--|-----------|------|
| Totals |  |  | 484062481 | 98.4 |
|--------|--|--|-----------|------|

Figure S36. MicroGC report of hydrogenation of beechwood sawdust (Table 4 in the manuscript)



# External Standard Report

Method Name: C:\Users\Administrator\Agilent\Method\20190717\_Luca\_Final.met  
 Data: C:\Users\Administrator\Agilent\Result\146\_sakk-108\_2021-11-15 11-58-38 (GMT +01-00).dat.rslt\146\_sakk-108\_2021-11-15 12-15-04 (GMT +01-00)-Rep3.dat  
 User: SYSTEM (SYSTEM)  
 Acquired: 11/15/2021 12:15:52 PM (GMT +01:00)  
 Printed: 11/15/2021 12:23:26 PM (GMT +01:00)

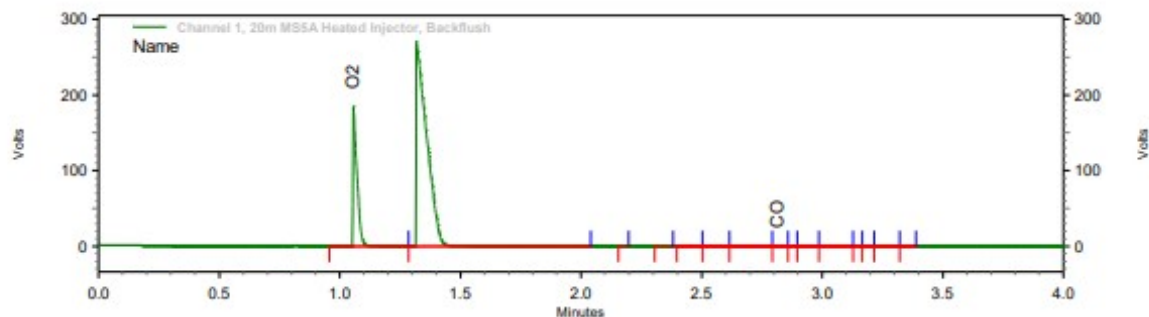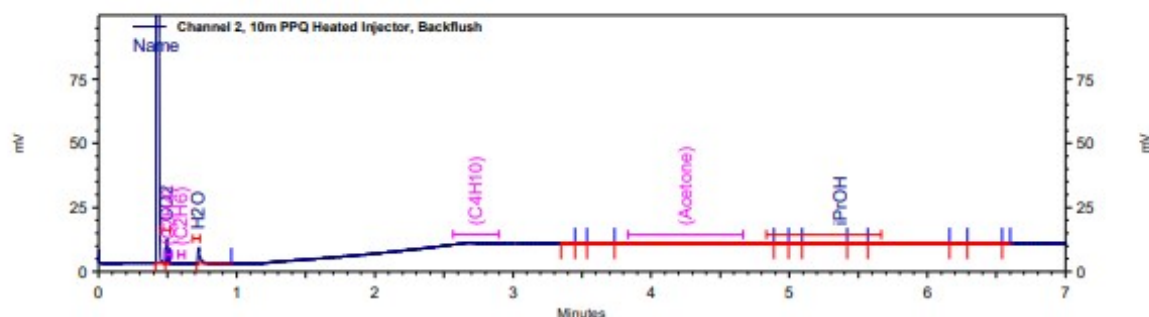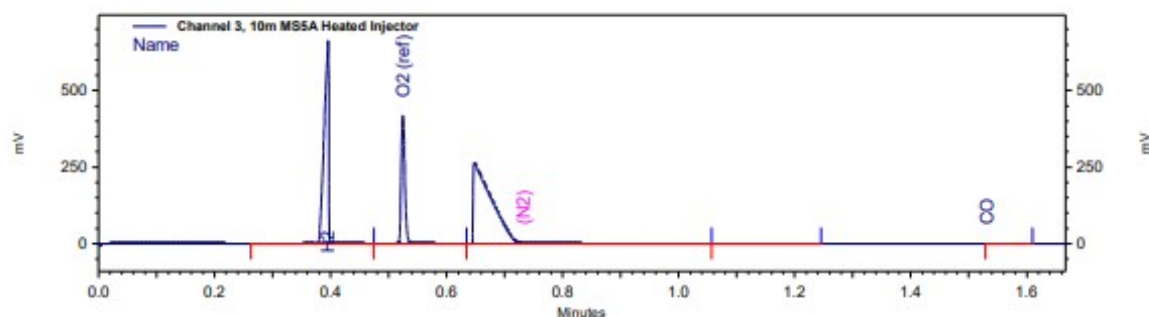

**Channel 1, 20m  
MSSA Heated  
Injector, Backflush  
Results**

| Pk # | Name | Retention Time | Area     | Concentration |
|------|------|----------------|----------|---------------|
| 1    | O2   | 1.1            | 21417274 | 19.9          |
|      | N2   |                |          | 0.0 BDL       |
|      | CH4  |                |          | 0.0 BDL       |
| 8    | CO   | 2.8            | 230      | 0.0           |

**External Standard Report**

Method Name: C:\Users\Administrator\Agilent\Method\20190717\_Luca\_Final.met  
 Data: C:\Users\Administrator\Agilent\Result\146\_sakk-108\_2021-11-15 11-58-38 (GMT +01-00).dat.rslt\146\_sakk-108\_2021-11-15 12-15-04 (GMT +01-00)-Rep3.dat  
 User: SYSTEM (SYSTEM)  
 Acquired: 11/15/2021 12:15:52 PM (GMT +01:00)  
 Printed: 11/15/2021 12:23:26 PM (GMT +01:00)

|        |  |  |          |      |
|--------|--|--|----------|------|
| Totals |  |  | 21417504 | 19.9 |
|--------|--|--|----------|------|

Channel 2, 10m  
 PPQ Heated  
 Injector, Backflush  
 Results

| Pk # | Name    | Retention Time | Area   | Concentration |
|------|---------|----------------|--------|---------------|
| 2    | CO2     | 0.5            | 582417 | 0.3           |
|      | C2H4    |                |        | 0.0 BDL       |
|      | C2H6    |                |        | 0.0 BDL       |
| 3    | H2O     | 0.7            | 670108 | 9.8           |
|      | C4H10   |                |        | 0.0 BDL       |
|      | Acetone |                |        | 0.0 BDL       |
| 10   | iPrOH   | 5.4            | 9466   | 0.0           |

|        |  |  |         |      |
|--------|--|--|---------|------|
| Totals |  |  | 1261991 | 10.1 |
|--------|--|--|---------|------|

Channel 3, 10m  
 MS5A Heated  
 Injector Results

| Pk # | Name     | Retention Time | Area     | Concentration |
|------|----------|----------------|----------|---------------|
| 1    | H2       | 0.4            | 36056238 | 4.7           |
| 2    | O2 (ref) | 0.5            | 18194089 | 19.0          |
|      | N2       |                |          | 0.0 BDL       |
| 5    | CO       | 1.5            | 1399     | 0.0           |

|        |  |  |          |      |
|--------|--|--|----------|------|
| Totals |  |  | 54251726 | 23.8 |
|--------|--|--|----------|------|

**Figure S37.** MicroGC report of the blank reaction using GVL as the substrate with Ru-MACHO-BH and H<sub>3</sub>PO<sub>4</sub>(aq) under 30 bar H<sub>2</sub> at 140 °C in water after 72 hours.

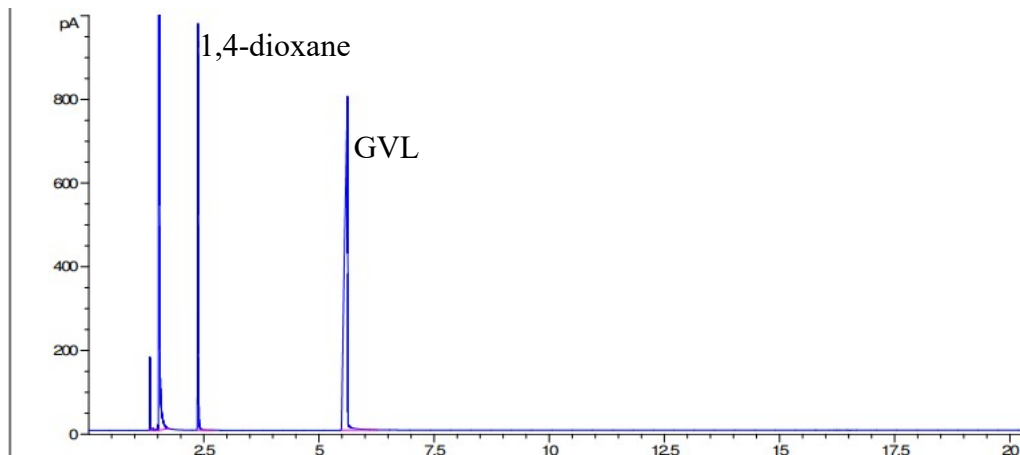

Area Percent Report

Sorted By : Signal  
 Calib. Data Modified : 12/8/2006 12:33:15 PM  
 Multiplier : 1.0000  
 Dilution : 1.0000  
 Use Multiplier & Dilution Factor with ISTDs

Signal 1: FID1 A,

| Peak # | RetTime [min] | Type | Width [min] | Area [pA*s] | Area %   | Name |
|--------|---------------|------|-------------|-------------|----------|------|
| 1      | 1.328         | BB   | 7.80e-3     | 86.76977    | 0.25062  | ?    |
| 2      | 1.391         | BB   | 9.28e-3     | 2.52223     | 0.00729  | ?    |
| 3      | 1.448         | BB   | 8.89e-3     | 5.78413e-1  | 0.00167  | ?    |
| 4      | 1.493         | EV   | 8.91e-3     | 7.27009     | 0.02100  | ?    |
| 5      | 1.517         | VB S | 9.25e-3     | 2.97472e4   | 85.92125 | ?    |
| 6      | 2.378         | HB   | 0.0163      | 1024.79126  | 2.95999  | ?    |
| 7      | 2.993         |      | 0.0000      | 0.00000     | 0.00000  | C14  |
| 8      | 3.466         |      | 0.0000      | 0.00000     | 0.00000  | C15  |
| 9      | 3.926         |      | 0.0000      | 0.00000     | 0.00000  | C16  |
| 10     | 5.623         | HB   | 0.0572      | 3752.33105  | 10.83818 | ?    |

Totals : 3.46214e4

**Figure S38.** GC-FID of the reaction mixture of GVL with 10.9 M of  $H_3PO_4(aq)$  and Ru-MACHO-BH under 30 bar  $H_2$  and 140 °C in water after 72 hours.

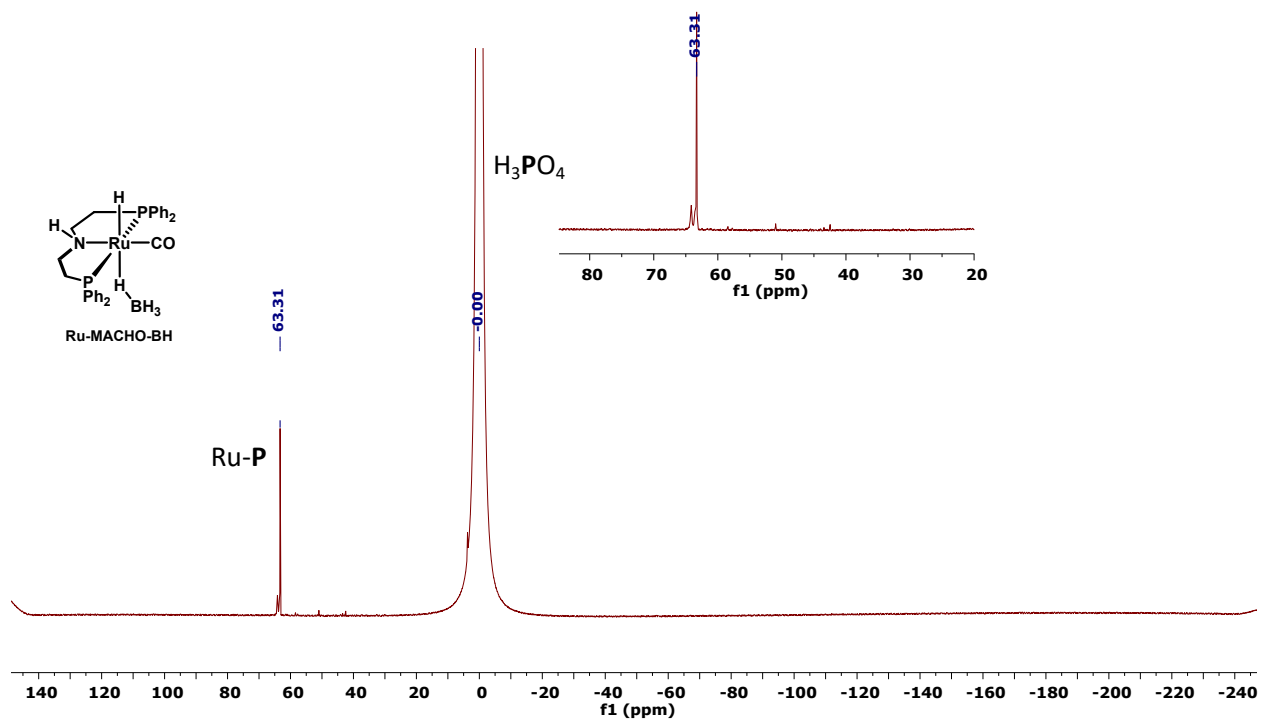

**Figure S39.**  $^{31}\text{P}$  NMR of the of the crude reaction mixture of sawdust with Ru-MACHO-BH and  $\text{H}_3\text{PO}_4$  in  $\text{H}_2\text{O}$  and  $\text{H}_2$  source after 48 hours.

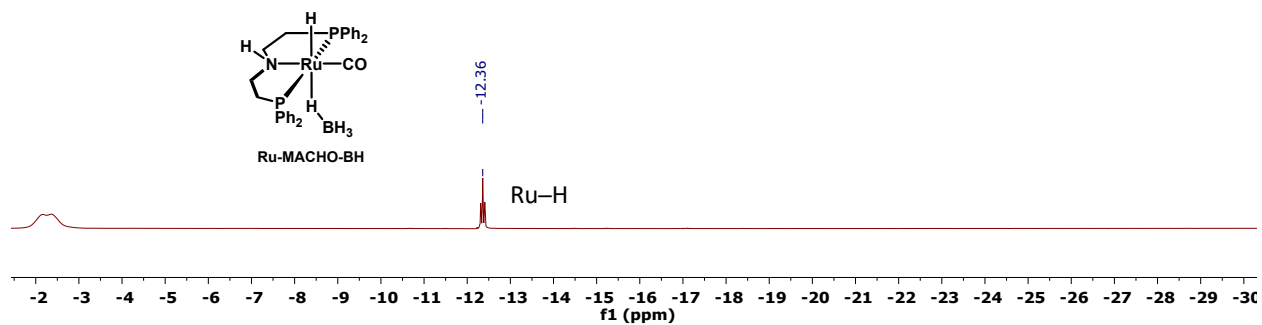

a. Standard  $^1\text{H}$  NMR of Ru-MACHO-BH

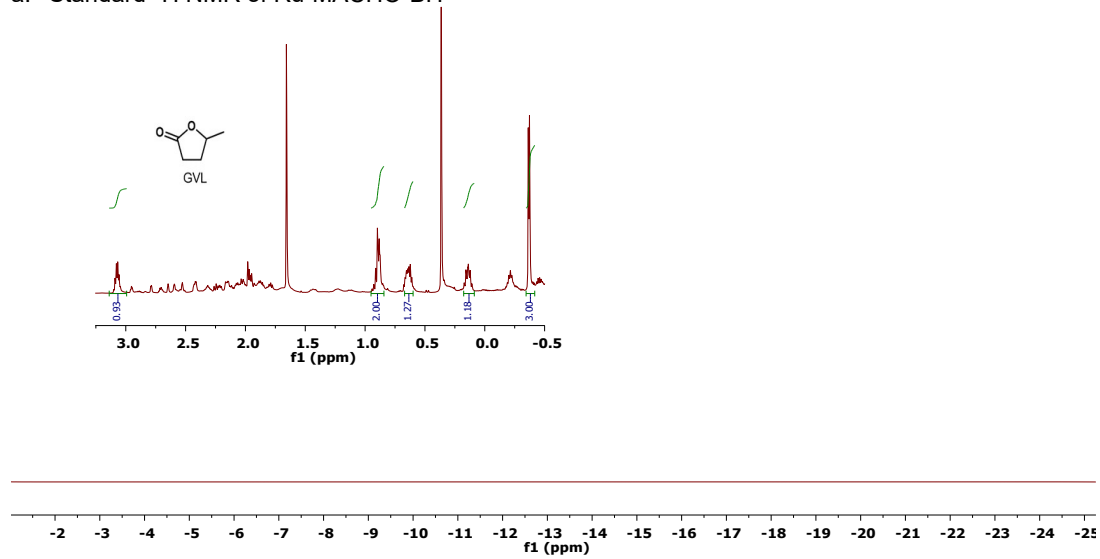

b.  $^1\text{H}$  NMR of the crude reaction mixture using beechwood sawdust as the substrate.

**Figure S40.**  $^1\text{H}$  NMR without addition of a deuterated lock solvent of the ruthenium hydride species in the catalyst (a), reaction crude of sawdust with Ru-MACHO-BH and  $\text{H}_3\text{PO}_4$  in  $\text{H}_2\text{O}$  and  $\text{H}_2$  source at  $140^\circ\text{C}$  after 48 hours (b). No hydride peak is detected.

## Moisture determination by TGA analysis

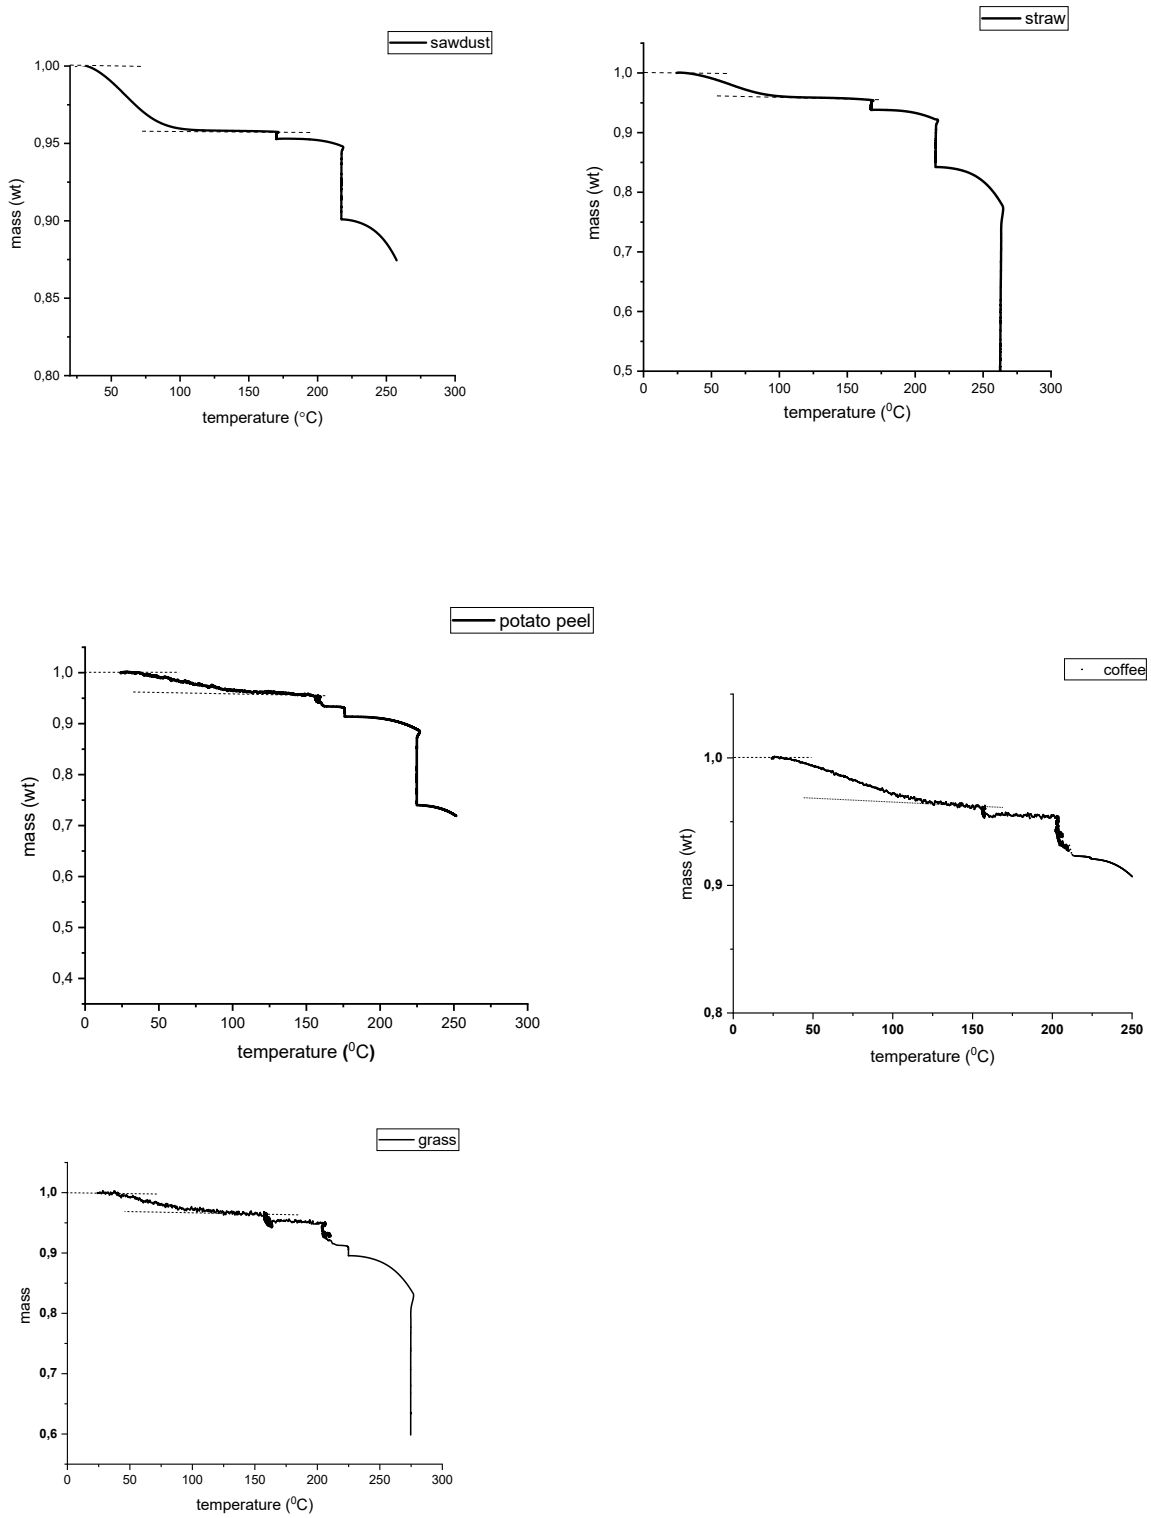

**Figure S41.** TGA profile for moisture content analysis based on thermal degradation of lignocellulosic biomass feedstock.

## Comparison of reaction conditions and GVL yields to state-of-the-art

**Table S3.** Comparison table of state-of-the-art and this work for the direct production of GVL from monosaccharides, polysaccharides, and raw biomass.

|                        | Catalysis type | Catalyst                                                 | Acid                                            | H-donor               | Conditions                                                  | Substrate                                                                                                                                                                                      | GVL yield                                                                                                                      | Manuscript reference |
|------------------------|----------------|----------------------------------------------------------|-------------------------------------------------|-----------------------|-------------------------------------------------------------|------------------------------------------------------------------------------------------------------------------------------------------------------------------------------------------------|--------------------------------------------------------------------------------------------------------------------------------|----------------------|
| <b>Raw biomass</b>     | Heterogeneous  | Ru/ZrO <sub>2</sub>                                      | Al <sub>2</sub> (SO <sub>4</sub> ) <sub>3</sub> | iPrOH                 | 180 °C<br>800 W microwave<br>60 min                         | Poplar<br>Corncob<br>Bamboo                                                                                                                                                                    | 12.2 wt%<br>8.9 wt%<br>10.6 wt%                                                                                                | 8b                   |
|                        | Homogeneous    | 1.8 wt%<br>Ru-MACHO-BH                                   | 10.9 M H <sub>3</sub> PO <sub>4</sub>           | 30 bar H <sub>2</sub> | 140 °C<br>H <sub>2</sub> O<br>24-120 h                      | Beechwood sawdust<br>Wheat straw<br>Bamboo<br>Paper<br>Grass<br>Pistachio shells<br>Used coffee grounds<br>Banana peel<br>Potato peel<br>Rice grains<br>Potato flour<br>Chitin<br>All combined | 26 wt%<br>18 wt%<br>20 wt%<br>22 wt%<br>12 wt%<br>12 wt%<br>11 wt%<br>10 wt%<br>10 wt%<br>16 wt%<br>20 wt%<br>13 wt%<br>15 wt% | This work            |
| <b>Polysaccharides</b> | Heterogeneous  | Ru/C                                                     | TFA                                             | 94 bar H <sub>2</sub> | 180 °C<br>H <sub>2</sub> O<br>8 h                           | Cellulose                                                                                                                                                                                      | 29%                                                                                                                            | 8a                   |
|                        |                | Ru/TiO <sub>2</sub>                                      | H <sub>3</sub> PW <sub>12</sub> O <sub>40</sub> | 40 bar H <sub>2</sub> | 150 °C<br>water-GBL<br>6 h                                  | Cellulose<br>Starch                                                                                                                                                                            | 40.5%<br>48%                                                                                                                   | 8c                   |
|                        |                | Ru-Cu/zeolite Y                                          |                                                 | 30 bar H <sub>2</sub> | 250 °C<br>Methanol<br>5 h                                   | Cellulose                                                                                                                                                                                      | 49.8%                                                                                                                          | 8d                   |
|                        |                | Chitosan-Ru/ZSM-5                                        |                                                 | formic acid           | 170 °C<br>PPh <sub>3</sub><br>EtOH/H <sub>2</sub> O<br>30 h | Hemicellulose                                                                                                                                                                                  | 30%                                                                                                                            | 9a                   |
|                        | Homogeneous    | 0.5 mol% Ru-MACHO-BH                                     | 7.5 M H <sub>3</sub> PO <sub>4</sub>            | 30 bar H <sub>2</sub> | 140 °C<br>H <sub>2</sub> O<br>48 h                          | Cellulose                                                                                                                                                                                      | 50%                                                                                                                            | This work            |
|                        |                | 0.5 mol% Ru-MACHO-BH                                     | 7.5 M H <sub>3</sub> PO <sub>4</sub>            | 30 bar H <sub>2</sub> | 125 °C<br>1:1 EtOH/H <sub>2</sub> O<br>48 h                 | Corn core hemicellulose<br>Beechwood hemicellulose                                                                                                                                             | 57%<br>75%                                                                                                                     |                      |
| <b>Monosaccharides</b> | Heterogeneous  | Ru/C                                                     | TFA                                             | 94 bar H <sub>2</sub> | 180 °C<br>H <sub>2</sub> O<br>8 h                           | Fructose                                                                                                                                                                                       | 62%                                                                                                                            | 8a                   |
|                        |                | Ru/TiO <sub>2</sub>                                      | H <sub>3</sub> PW <sub>12</sub> O <sub>40</sub> | 40 bar H <sub>2</sub> | 130-150 °C<br>water-GBL<br>6 h                              | Fructose<br>Glucose                                                                                                                                                                            | 68%<br>55%                                                                                                                     | 8c                   |
|                        |                | Chitosan-supported ruthenium catalyst with ZSM           |                                                 | HCOOH                 | 170 °C<br>30 h                                              | Xylose                                                                                                                                                                                         | 37%                                                                                                                            | 9a                   |
|                        |                | Zr-Al-beta zeolite                                       |                                                 | iPrOH                 | 190 °C<br>48 h                                              | Xylose                                                                                                                                                                                         | 35%                                                                                                                            | 9c                   |
|                        | Homogeneous    | Cat/substrate 1:270 mol/mol<br>RuCl <sub>3</sub> , TPPTS | TFA                                             | 94 bar H <sub>2</sub> | 180 °C<br>H <sub>2</sub><br>NaI<br>8 h                      | Glucose                                                                                                                                                                                        | 23%                                                                                                                            | 8a                   |
|                        |                | 0.5 mol% Ru-MACHO-BH                                     | 5.7 M H <sub>3</sub> PO <sub>4</sub>            | 30 bar H <sub>2</sub> | 125 °C<br>1:1 EtOH/H <sub>2</sub> O<br>48 h                 | Glucose<br>Fructose<br>Xylose                                                                                                                                                                  | 31%<br>34%<br>73%                                                                                                              | This work            |

**Table S4.** Solvent optimization for various biomass substrates.

| Substrate                 | H <sub>3</sub> PO <sub>4</sub> (M) | Solvent                     | GVL Yield <sup>a</sup> |
|---------------------------|------------------------------------|-----------------------------|------------------------|
| Xylose                    | 3.8                                | DMSO                        | -                      |
| Xylose                    | 3.8                                | IPA                         | 43                     |
| Xylose                    | 3.8                                | MeOH                        | 38                     |
| Xylose                    | 3.8                                | MeOH/H <sub>2</sub> O       | 40                     |
| Xylose                    | 3.8                                | EtOH                        | 44                     |
| Xylose                    | 3.8                                | EtOH/H <sub>2</sub> O (1:1) | 45                     |
| Xylose                    | 3.8                                | EtOH/H <sub>2</sub> O (7:3) | 45                     |
| Xylose                    | 3.8                                | EtOH/H <sub>2</sub> O (3:7) | 27                     |
| Glucose                   | 3.8                                | MeOH                        | 6                      |
| Glucose                   | 3.8                                | MeOH/H <sub>2</sub> O (1:1) | 17                     |
| Glucose                   | 3.8                                | EtOH                        | 8                      |
| Glucose                   | 3.8                                | EtOH/H <sub>2</sub> O (1:1) | 21                     |
| Fructose                  | 3.8                                | MeOH                        | 20                     |
| Fructose                  | 5.7                                | MeOH/H <sub>2</sub> O (1:1) | 28                     |
| Fructose <sup>b</sup>     | 3.8                                | EtOH                        | 17                     |
| Fructose                  | 3.8                                | EtOH/H <sub>2</sub> O (1:1) | 25                     |
| Hemicellulose (corn core) | 3.8                                | MeOH                        | 43                     |
| Hemicellulose (corn core) | 3.8                                | EtOH                        | 52                     |
| Hemicellulose (corn core) | 5.7                                | EtOH/H <sub>2</sub> O (1:1) | 56                     |
| Hemicellulose (corn core) | 7.5                                | H <sub>2</sub> O            | 8                      |
| Cellulose (0.6)           | 5.7                                | EtOH/H <sub>2</sub> O (1:1) | 5                      |
| Cellulose (0.6)           | 5.7                                | H <sub>2</sub> O            | 19                     |

Standard reaction conditions: Substrate (0.6 M), Ru-MACHO-BH (0.5 mol%), Solvent (1 mL), at 125 °C and 30 bar H<sub>2</sub>. <sup>a</sup> Determined by GC-FID using 1,4-dioxane as the internal standard, <sup>b</sup> 96 hours.
